1 **Title: Improved mammalian retromer cryo-EM structures reveal a new assembly interface**

2

3 **Running title: Retromer cryo-EM reveals new interface**

4

5 Amy K. Kendall<sup>1,2</sup>, Mintu Chandra<sup>1,2</sup>, Boyang Xie<sup>1</sup>, William Wan<sup>2,3</sup>, and Lauren P. Jackson<sup>1,2,3</sup>

6

7 <sup>1</sup>Department of Biological Sciences, Vanderbilt University, Nashville, TN, USA

8 <sup>2</sup>Center for Structural Biology, Vanderbilt University, Nashville, TN, USA

9 <sup>3</sup>Department of Biochemistry, Vanderbilt University, Nashville, TN, USA

10

11 †Correspondence to [lauren.p.jackson@vanderbilt.edu](mailto:lauren.p.jackson@vanderbilt.edu)

12

### 13 **Abstract**

14 Retromer (VPS26/VPS35/VPS29 subunits) assembles with multiple sorting nexin (SNX)

15 proteins on membranes to mediate endosomal recycling of transmembrane protein cargoes.

16 Retromer has been implicated in other cellular events, including mitochondrial homeostasis,

17 nutrient sensing, autophagy, and fission events. Mechanisms for mammalian retromer assembly

18 remain undefined, and retromer engages multiple sorting nexin proteins to sort cargoes to

19 different destinations. Published structures demonstrate mammalian retromer forms oligomers *in*

20 *vitro*, but several structures were poorly resolved. We report here improved retromer oligomer

21 structures using single particle cryo-electron microscopy (cryo-EM) by combining data collected

22 from tilted specimens with multiple improvements in data processing, including using a three-

23 dimensional (3D) starting model for improved automated particle picking in RELION. A

24 retromer mutant (3KE retromer) that breaks VPS35-mediated interfaces was used to determine a

25 structure of a new assembly interface formed by the VPS26A and VPS35 N-termini. The

26 interface reveals how an N-terminal VPS26A arrestin saddle can link retromer chains by

27 engaging a neighboring VPS35 N-terminus, on the opposite side from the well-characterized C-

28 VPS26/N-VPS35 interaction observed within heterotrimers. The new interaction interface

29 exhibits substantial buried surface area ( $\sim 7,000 \text{ \AA}^2$ ) and further suggests metazoan retromer may

30 serve as an adaptable scaffold.

31

## 32 **Introduction**

33 Eukaryotic cells contain multiple membrane-enclosed organelles, which dynamically  
34 communicate with each other through membrane trafficking pathways. Trafficking ensures  
35 exchange of lipid and protein cargoes between donor and acceptor compartments, and trafficking  
36 events are spatiotemporally regulated by multiple large multi-protein complexes. Retromer  
37 (VPS26/VPS35/VPS29 subunits) is one important complex that plays a well-established role in  
38 protein sorting at endosomes by maintaining dynamic localization of hundreds of transmembrane  
39 proteins that traverse the endocytic system. Mammalian retromer associates with the cytosolic  
40 face of endosomes, where it functions to recycle receptors, transporters, and adhesion molecules.  
41 Retromer is thought to mediate retrograde recycling to the *trans*-Golgi network (TGN) (1–3) or  
42 to the plasma membrane (4–7) through sorting into tubular-vesicular carriers (reviewed in (8–  
43 10)). Retromer-dependent cargoes undergo selective trafficking to avoid sorting to late  
44 endosomes and subsequent degradation in lysosomes (11), which ensures cells maintain  
45 homeostasis of transmembrane cargoes at the plasma membrane and within the endolysosomal  
46 system. Retromer trafficking pathways become dysregulated in multiple ways, including aberrant  
47 protein processing (12) and sorting (13, 14). Disruptions to retromer trafficking in turn drive  
48 protein misfolding linked with neurological and neurodegenerative conditions, including  
49 Alzheimer’s disease (AD) (15–17), Parkinson’s disease (PD) (18), and Down’s syndrome (19,  
50 20). Retromer pathways can also be hijacked by both bacterial and viral pathogens (21, 22).

51  
52 Retromer is thus well established as an evolutionarily conserved heterotrimer that binds different  
53 Sorting Nexin (SNX) proteins to mediate cargo sorting from phosphatidylinositol-3-phosphate  
54 (PtdIns3P)-enriched endosomal membranes. Retromer binds multiple sorting nexin family  
55 members, including SNX-BARs, SNX3, and metazoan-specific SNX27 (reviewed recently in  
56 (10, 23, 24)). The retromer heterotrimer (formerly called Cargo Selective Complex, or CSC) has  
57 been implicated in direct cargo recognition in both mammalian cells (2, 25) and yeast (1, 26).  
58 More recently, SNX-BARs have been shown to bind cargo directly in mammalian cells (27, 28),  
59 and SNX3 promotes cargo recognition in both yeast (29, 30) and mammalian cells (31). Yeast  
60 SNX-BAR/retromer (32) and both yeast and mammalian SNX3/retromer (33) complexes have  
61 been shown to form tubules *in vitro*. SNXs may therefore be considered critical adaptors that

62 promote membrane recruitment (5, 34); recognize cargo (6, 27, 31, 35, 36); and drive tubule  
63 formation (34).

64  
65 From a structural viewpoint, multiple crystal (31, 37–39), single particle cryo-EM (40), and  
66 cryo-ET (32, 33) structures have revealed how retromer subunits fold in three-dimensional  
67 space; how subunits interact to form a stable and elongated heterotrimer; and how heterotrimers  
68 assemble *in vitro* to form higher order oligomers in vitreous ice (40) or assembled on membranes  
69 with sorting nexins (32, 33). Briefly, VPS35 adopts an elongated  $\alpha$ -helical solenoid fold. VPS26  
70 exists as three orthologues in mammals (VPS26A/VPS26B/VPS26C) and adopts a bi-lobal  
71 arrestin-like fold (39, 41). VPS26A and VPS26B bind the highly conserved VPS35 N-terminus  
72 (39), while VPS26C binds VPS35-like (VPS35L) in the retriever complex (42). VPS29 contains  
73 a metallophosphoesterase fold (38, 43) that serves as a scaffold for binding the  $\alpha$ -helical solenoid  
74 of the VPS35 C-terminus (31, 37, 40). Cryo-ET reconstructions revealed how retromer  
75 assembles with either SNX-BAR or SNX3 on membranes. Retromer assembles on top of either  
76 SNX-BAR dimers or SNX3 to form high V-shaped arches mediated by interactions between  
77 VPS35 subunits. Back-to-back VPS26 dimers mediate interactions with SNX-BARs or SNX3. In  
78 solution, mammalian retromer forms multiple oligomers, including the retromer heterotrimer;  
79 dimers of trimers; a tetramer of trimers; and extended flat chains (40). The existence of multiple  
80 oligomeric assemblies suggests mammalian retromer may function as a flexible scaffold. Single  
81 particle and biochemical data revealed critical residues in the VPS35/VPS35 assembly interface,  
82 which was tested biochemically and in yeast (40) and subsequently reported in cryo-ET  
83 reconstructions (33). The cryo-ET and single particle reconstructions share several common  
84 themes. The mammalian VPS35/VPS35 dimer interface resembles yeast VPS35 dimers observed  
85 at the top of the V-shaped arches (32, 33). However, the curvature of the mammalian VPS35  
86 interfaces observed in dimers and chains differs, which results in long and flat chains (40).  
87 Additionally, mammalian retromer appears to form a VPS26A-mediated “tip to tip” dimer (40)  
88 that differs from back-to-back VPS26 dimers observed in the presence of SNX3 (33) or the yeast  
89 SNX-BAR, Vps5 (32). The mammalian VPS26 “chain link” interface was poorly resolved  
90 because particles exhibit severely preferred orientation. These data suggest VPS26 may be  
91 capable of forming at least two different dimers, but the biological context of the “tip-to-tip”

92 dimers remains unknown. Improved structural data for this putative interface is important so that  
93 structural models can be used to test function in cell culture or model organisms.

94

95 In this work, we report improved single particle cryo-EM reconstructions of multiple mammalian  
96 retromer oligomers, including the heterotrimer, dimers of trimers, and two VPS35/VPS35 sub-  
97 structures. These improved structural models arise from multiple improvements implemented  
98 during data collection and processing. Acquisition of tilted datasets provided critical missing  
99 views for some particles. For some structures, early rounds of automated particle picking using a  
100 three-dimensional (3D) starting model in RELION also provided additional views. Map  
101 sharpening followed by real space refinement in PHENIX resulted in improved heterotrimer  
102 reconstructions that allowed subunits to be assigned in maps more confidently. We further report  
103 a new structure of the N-VPS26A/N-VPS35 “chain link” interface using a retromer mutant (3KE  
104 mutant) that breaks VPS35 interfaces in chains (40). This new interface is formed by interactions  
105 between the VPS26A N-terminal arrestin fold with the N-terminus of VPS35 in a neighboring  
106 heterotrimer. The presence of this particle *in vitro* suggests retromer may be capable of forming a  
107 variety of assemblies, even in the absence of sorting nexin proteins.

108

## 109 **Results**

110

111 *Retromer heterotrimer.* To generate improved reconstructions, we combined images from  
112 previously published data (40) with a new third data set in which specimens were tilted to gain  
113 additional views (Figure S1; Table 1) (44). We obtained an improved heterotrimer reconstruction  
114 from 43,808 particles with an average resolution of 4.9 Å. Figure 1 formally compares this  
115 structure (panels A, C, E, G; (44)) with the previously published version (panels B, D, F, H;  
116 (40)). Critical missing views were acquired from the additional tilted data set (Figure 1E versus  
117 1F). Map sharpening in PHENIX followed by several rounds of refinement and model building  
118 (see Methods) substantially improved the heterotrimer model (Figure 1A; 1G; Table 2). This  
119 structure demonstrates improved local resolution across the heterotrimer (Figure 1C, 1D). In the  
120 previous version (40), the N-VPS35/C-VPS26 interface was poorly resolved (Figure 1B, 1D)  
121 compared to the VPS35/VPS29 interface. In the new structure, the arrestin “saddle” fold of

122 VPS26 is more clearly resolved (Figure 1A, 1G). Overall, improvements in both data collection  
123 and processing (see Discussion) played a key role in generating a higher quality reconstruction.

124  
125 *Retromer dimers of trimers.* Retromer has been shown to form “dimers of heterotrimers” using  
126 both biophysical (40, 45) and structural (40) methods. In all reported conditions, formation of  
127 retromer dimers is mediated by the C-termini of VPS35 subunits. This dimer particle structure  
128 was very poorly resolved (18 Å average resolution) in previous studies (40). Others have  
129 reported improvements in single particle structure determination by using a 3D starting model  
130 (46) in early rounds of automated particle picking. We employed this strategy in RELION using  
131 a previously obtained data set (40) and a 3D starting model filtered to 20 Å to gain additional  
132 views of dimers in all possible orientations. We obtained an improved reconstruction (Figure 2A;  
133 Figure S2) from 288,247 particles with an average resolution of 7.0 Å. The presence of  
134 additional views substantially improved the structure (Figure 2E, 2F), although the N-terminal  
135 end of one heterotrimer remains poorly resolved and overall resolution remains limited compared  
136 to the heterotrimer (Figure 1).

137  
138 Fitting rigid body models into Coulomb potential maps can be ambiguous, especially at modest  
139 resolution. Therefore, we systematically analyzed map handedness in the improved dimer  
140 reconstructions to generate the best model given the data. Briefly, we undertook the following  
141 approach (47). Both the original and flipped maps were used to perform a global search in which  
142 3,000 random orientations of the real space refined heterotrimer model (details in Methods) were  
143 fitted as rigid bodies. A list of potential fits and cross-correlation coefficients were generated for  
144 both maps (Figure S3A, D). Analyzing both maps with the top fitted model clearly demonstrated  
145 the map with correct handedness (compare S3B, C with S3E, F).

146  
147 *VPS35/VPS35 sub-structures.* Work from multiple labs has now demonstrated both yeast and  
148 mammalian retromer form VPS35-mediated dimer interfaces in solution (40, 45) and when  
149 assembled on membranes (32, 33). We re-visited two published sub-structures of VPS35/VPS35-  
150 mediated dimers (40) to generate improved reconstructions. The first sub-structure (Figure 3A)  
151 was determined from VPS35-mediated dimers observed in elongated retromer chains (40). The  
152 second (Figure 3B) was determined from retromer dimers after employing a 3D starting model in

153 autopicking (previous section). The improved sub-structures revealed both interfaces are  
154 asymmetrical (C1 symmetry; Figure S1) and place specific electrostatic residues directly in the  
155 interface. These highly conserved residues (E615, D616, E617, K663, K701, K705) were  
156 identified and tested in our previous work (40), and improved sub-structures presented here now  
157 provide the highest resolution views of this critical VPS35-mediated assembly interface (see  
158 Discussion).

159  
160 *A new oligomeric interface mediated by VPS26A and VPS35.* One major limitation of our  
161 previous study was an inability to resolve a new dimer interface found in chain links and  
162 mediated by the N-terminus of VPS26 subunits (chain interface II in (40)). These elongated  
163 chain particles exhibited extreme preferred orientation, so we used a published mutant that  
164 breaks the VPS35/VPS35 dimer interface to generate a particle more tractable for cryo-EM  
165 studies. This retromer “3KE” mutant (40) enriches the heterogeneous retromer protein sample  
166 for particles that form dimers only at the VPS26 end. These smaller 3KE retromer mutant  
167 particles resemble the “f-hole” found on the body of a violin (Figure 4). We obtained a tilted data  
168 set from 3KE mutant retromer in the presence of a small cyclic peptide called RT-L4 (44), which  
169 has been shown to stabilize retromer structure. The presence of this peptide further enriched our  
170 protein sample for 3KE mutant particles. We generated a reconstruction of 3KE mutant dimers  
171 (Figure 4A) from 40,957 particles using a 3D starting model (details in Methods) at an average  
172 resolution of 7.1 Å. One heterotrimer in this particle appears better resolved than the other  
173 (Figure 4C), which may reflect how the particle behaves at the air-water interface. The RT-L4  
174 peptide is extremely hydrophobic, and 3KE particles with RT-L4 tend to exhibit preferred  
175 orientation by aligning along the plane of the interface (Figure 4E). To better resolve the  
176 interaction, we determined a sub-structure centered on the chain link from 19,386 particles at an  
177 average resolution of 6.7 Å. Although one copy of N-VPS35 remains more poorly resolved  
178 (Figure 4D), the sub-structure provides the first compelling view of this interface. The chain link  
179 is mediated by a new interaction between the N-terminal arrestin saddle of VPS26 in one  
180 heterotrimer with the N-terminus of VPS35 in a neighboring heterotrimer.

181  
182 *Analysis of the N-VPS26 and N-VPS35 interface.* To further characterize the chain link interface,  
183 buried surface area was calculated using PISA (48) (Figure 5). Within each retromer

184 heterotrimer, interactions between N-VPS35 and C-VPS26 (Figure 5A; black & grey hatched  
185 circles) bury between 6,382 and 6,987 Å<sup>2</sup> (Figure 5B). For comparison, the buried surface  
186 interface between N-VPS35 and C-VPS26 in the heterotrimer structure (Figure 1) is 6,178 Å<sup>2</sup>.  
187 The slightly larger buried surface area values for the equivalent interface in 3KE mutant particles  
188 is consistent with RT-L4 playing a stabilizing role in this interface (44). The two new interfaces  
189 are located on the opposite face of N-VPS35, where each N-VPS35 interacts with an N-VPS26  
190 subunit from a neighboring molecule (Figure 5A; black and grey circles). Each new interface  
191 buries around 7,000 Å<sup>2</sup> (Figure 5B). This analysis suggests the new interface buries  
192 approximately the same amount of surface as the well-characterized interaction between N-  
193 VPS35 and C-VPS26 within a retromer heterotrimer. The VPS35 N-terminal helix (residues 12-  
194 36) interacts specifically with two VPS26A β-strands (residues 48-56; 105-111) and their  
195 connecting loops (residues 56-63; 101-105) (Figure S6D, S6E). Like the C-terminal  
196 VPS35/VPS35 interfaces (previous section), this N-VPS26/N-VPS35 interface does not exhibit  
197 two-fold symmetry.

198

## 199 Discussion

200

201 *Improved data acquisition and image processing.* Two major improvements allowed us to  
202 generate better reconstructions of retromer oligomers and to determine the structure of a new  
203 interface. First, data acquisition from tilted specimens retrieved multiple and important missing  
204 views for several structures, including retromer dimer and 3KE mutant particles. We previously  
205 proposed the VPS35 subunit could exhibit flexibility along the length of its α-helical solenoid, as  
206 judged by local resolution along the heterotrimer particle (40). However, the new reconstruction  
207 (Figure 1) instead suggests the poor local resolution at the N-terminus was instead driven by  
208 missing views. The decision to collect data from tilted specimens varies among practitioners, and  
209 our experience points to the importance of considering this as a data collection strategy. The  
210 second improvement arose from using a 3D starting model in early rounds of automated particle  
211 picking. Use of the 3D starting model helps programs identify and include poorly sampled views,  
212 and this was particularly effective in generating improved structures of retromer dimer and 3KE  
213 mutant particles.

214

215 *C-VPS35 dimer interfaces*. The VPS35/VPS35 interface (Figure 3) we reported previously (40)  
216 includes several important conserved electrostatic residues observed at the top of retromer arches  
217 on membranes (32, 33). Both new sub-structures further support the placement of these residues  
218 in the interface. The improved structures also reveal the interface is not two-fold symmetrical, in  
219 agreement with reconstituted SNX3/retromer coats (33). We considered the possibility that  
220 VPS35-mediated dimers of heterotrimers observed in vitreous ice might represent V-shaped  
221 arches observed on membranes (32, 33). However, modelling arches into Coulomb potential  
222 maps after ascertaining correct handedness (Figure S6A) does not support this. Extended  
223 assemblies such as retromer dimers will likely be affected during sample blotting, so it is  
224 possible that arches observed on membranes have been flattened during the plunge freezing  
225 process by interactions at the air/water interface or by surface tension effects. Alternatively,  
226 dimers may represent a more loosely associated retromer structure that is further organized when  
227 it encounters relevant SNX proteins and cargoes on membranes.

228  
229 *N-VPS26/N-VPS35 interface*. The interface between the N-termini of VPS35 and VPS26A was  
230 previously observed in published structures of retromer chains (40) but is resolved more clearly  
231 in this work (Figure 4) by using a retromer mutant that breaks the long chains into smaller  
232 particles. The interface buries a substantial amount of surface area (nearly 7,000 Å<sup>2</sup>), suggesting  
233 it is a relatively stable particle *in vitro*. It is important to note this structure was determined in the  
234 presence of RT-L4 (44), a small molecule shown to stabilize the N-VPS35/C-VPS26 interface.  
235 The resolution of our structure is too low to locate or assign RT-L4, but in our hands, the  
236 presence of RT-L4 appeared to increase the number of 3KE retromer particles observed on grids.  
237 This suggests stabilizing the retromer heterotrimer in turn stabilized its ability to form the N-  
238 VPS26A/N-VPS35 interface.

239  
240 The resolution of both the 3KE particle structure and its sub-structure (~7 Å) are substantially  
241 lower than the C-VPS35 interface sub-structure determined from chains (~4.5 Å). The limited  
242 resolution makes it difficult to accurately identify specific residues mediating the interface with  
243 high confidence since side chains cannot be assigned. Alpha-helices located in VPS35 interfaces  
244 (Figure 3A, 3B) can be more confidently fit, compared to the VPS26 β-sheets in the 7 Å  
245 resolution chain link sub-structure (Figure 4H). However, surface views of the interface suggest



246 the two N-termini are complementary in overall shape (Figure S6D, E). We also note the VPS26  
247 N-terminal arrestin subdomain is less conserved than the C-terminal subdomain (Figure S6F)  
248 (39), which may suggest retromer from different species cannot build this interface.

249  
250 The biological relevance of the N-VPS26A/N-VPS35 interface remains unknown. It will be  
251 important to test these structural models by mutating multiple residues along the interface to  
252 ascertain whether disruption drives cargo sorting or other defects. In addition to endosomal  
253 sorting, retromer has been implicated in other important cellular processes, including  
254 mitochondrial derived vesicle formation (49) and regulation of mitochondrial membrane  
255 integrity (50), as well as nutrient sensing (51, 52) and autophagy (53). How retromer regulates  
256 mitochondrial morphology is unknown (54). Recent work (55) indicates a family of proteins  
257 called PROPPINs can compete with SNX proteins for retromer binding under certain conditions,  
258 and these PROPPIN-retromer interactions are linked to membrane fission events. Overall, the  
259 diversity of potential metazoan retromer functions suggests retromer may also have expanded its  
260 structural repertoire to assemble in different ways. This is not unprecedented, as other trafficking  
261 proteins have been shown to assemble in different ways. One well-studied example is clathrin,  
262 since clathrin on its own forms different lattices (56), and clathrin coated vesicles purified from  
263 brain exhibit a variety of geometries (57). It will be interesting to determine whether and how  
264 retromer may serve as a flexible scaffold to build different structures to mediate cellular events  
265 under a variety of conditions.

266

## 267 **Materials & Methods**

268

269 *Reagents.* Unless otherwise noted, all chemicals were purchased from Fisher (Waltham, MA,  
270 USA).

271

272 *Molecular biology and cloning.* Both wild-type (38, 39) and 3KE mutant (40) retromer  
273 constructs have been published previously. Briefly, mouse VPS35 and VPS29 were placed in  
274 vector pGEX4T2 (GE Healthcare), while VPS26 was placed in in-house vector pMWKan. A  
275 two-stage quick-change mutagenesis protocol (58) was adapted to introduce three point

276 mutations (K659E/K662E/K663E) into the VPS35 subunit to generate the retromer “3KE”  
277 electrostatic mutant that disrupts VPS35/VPS35 interface formation.

278  
279 *Protein Expression and Purification.* Recombinant retromer protein (wild-type or 3KE mutant)  
280 was expressed and purified from *E. coli* as previously described (40). Briefly, retromer plasmids  
281 were transformed into BL21(DE3) Rosetta2 pLysS cells (Millipore). Cells were grown to an  
282 OD<sub>600</sub> between 0.8-1.0 and induced for 16-20 hours at 22°C with 0.4 mM IPTG. Cells were lysed  
283 by a disruptor (Constant Systems). The protein was purified in 10 mM Tris-HCl (pH 8.0), 200  
284 mM NaCl, 2 mM βME using Glutathione Sepharose (GE Healthcare). Protein was cleaved  
285 overnight using thrombin (Recothrom, The Medicines Company) at room temperature and batch  
286 eluted in buffer. Retromer was further purified by gel filtration on a Superdex S200 16/60  
287 analytical column (GE Healthcare) into 10 mM Tris-HCl (pH 8.0), 200 mM NaCl, or dialyzed  
288 into 20 mM HEPES pH 8.2, 50 mM NaCl, 2 mM DTT prior to vitrification.

289  
290 *Negative Stain Grid Preparation & Screening.* For screening negatively stained retromer  
291 samples, 10 ml of retromer at concentrations between 5 and 10 μg/mL were applied to  
292 continuous carbon film on 400 square mesh copper EM grids (Electron Microscopy Sciences,  
293 Hatfield, PA) and washed twice with water. The grids were stained with 2% uranyl formate and  
294 1% uranyl acetate and air dried overnight. The grids were screened on a ThermoFisher Morgagni  
295 microscope operating at 100 kV with an AMT 1Kx1K CCD camera (Center for Structural  
296 Biology Cryo-EM Facility, Vanderbilt University) to verify protein quality.

297  
298 *Cryo-EM sample preparation and data collection.*

299 *Grid preparation.* For cryo-electron microscopy, 2 μl retromer at a concentration between 80-  
300 100 μg/ml was applied to freshly glow discharged CF-2/2-2C C-Flat grids (Protochips,  
301 Morrisville, NC) or Quantifoil R 1.2/1.3 300 mesh copper grids (Quantifoil Micro Tools GmbH,  
302 Großlöbichau, Germany). Grids were vitrified in liquid ethane using either a ThermoFisher  
303 MarkIII or MarkIV Vitrobot, with blot times between 2-3.5 seconds and chamber conditions of  
304 100% relative humidity and 8-20°C.

305

306 *Heterotrimer and flat substructure data collection.* Micrographs from three separate data  
307 collections were used to generate the heterotrimer and flat substructure models. Each data  
308 collection is summarized below and full details are also provided in Table 1. RELION-2 (59) and  
309 RELION-3 (60) were used for all image processing unless otherwise indicated.

310  
311 Data collection #1: 1480 micrographs were collected on a ThermoFisher Titan Krios microscope  
312 at the National Resource for Automated Molecular Microscopy (NRAMM). The microscope  
313 operated at 300 keV and was equipped with a Gatan BioQuantum energy filter with a slit width  
314 of 20eV, a spherical aberration (Cs) corrector, and a Gatan K2 Summit direct electron detector  
315 camera. The nominal magnification used during data collection was 105,000x, and the pixel size  
316 was 1.096 Å/pix. The total electron dose was  $69.34e^-/A^2$ . Data collection was accomplished  
317 using Leginon (61). Images were motion corrected using MotionCor2 (62). The CTF of each  
318 micrograph was determined using Gctf (63); defocus values for the data varied between -0.7 and  
319 -2.6 μm.

320  
321 Data collection #2: 1299 micrographs were collected on a ThermoFisher Titan Krios microscope  
322 at the National Resource for Automated Molecular Microscopy (NRAMM). The microscope  
323 operated at 300 keV and was equipped with a Gatan BioQuantum energy filter with a slit width  
324 of 20eV and a Gatan K2 Summit direct electron detector camera. The nominal magnification  
325 used during data collection was 105,000x, and the pixel size was 1.06 Å/pix. The total electron  
326 dose was  $73.92e^-/A^2$ . Data collection was accomplished using Leginon. Images were motion  
327 corrected using MotionCor2, and micrographs from this data collection were rescaled to match  
328 the 1.096Å/pix pixel size from the first data collection using an NRAMM script written for  
329 MotionCor2. The CTF of each micrograph was determined using Gctf; defocus values for the  
330 data varied between -0.8 and -4.4 μm.

331  
332 Data collection #3: 891 micrographs were collected on a ThermoFisher Titan Krios microscope  
333 at the National Resource for Automated Molecular Microscopy (NRAMM). The microscope  
334 operated at 300 keV and was equipped with a Gatan BioQuantum energy filter with a slit width  
335 of 20eV and a Gatan K2 Summit direct electron detector camera. The nominal magnification  
336 used during data collection was 105,000x, and the pixel size was 1.06 Å/pix. The total electron

337 dose was  $73.92e^-/A^2$ , and micrographs were collected at  $\pm 15^\circ$  tilts. Data collection was  
338 accomplished using Legikon. Images were motion corrected using MotionCor2, and micrographs  
339 from this data collection were rescaled to match the  $1.096\text{\AA}/\text{pix}$  pixel size from the first data  
340 collection using an NRAMM script written for MotionCor2. The CTF of each micrograph was  
341 determined using Gctf; defocus values for the data varied between  $-0.8$  and  $-4.7\mu\text{m}$ .

342  
343 *Dimer and dimer substructure data collection.* 1480 micrographs were collected on a  
344 ThermoFisher Titan Krios microscope at the National Resource for Automated Molecular  
345 Microscopy (NRAMM). The microscope operated at 300 keV and was equipped with a Gatan  
346 BioQuantum energy filter with a slit width of 20eV and a Gatan K2 Summit direct electron  
347 detector camera. The nominal magnification used during data collection was 105,000x, and the  
348 pixel size was  $1.096\text{\AA}/\text{pix}$ . The total electron dose was  $69.34e^-/A^2$ . Data collection was  
349 accomplished using Legikon. Images were motion corrected using MotionCor2. The CTF of  
350 each micrograph was determined using Gctf; defocus values for the data varied between  $-0.7$  and  
351  $-2.6\mu\text{m}$ . RELION-3 was used for all image processing unless otherwise indicated.

352  
353 *Retromer 3KE mutant (f-hole) and sub-structure data collection.* 4791 micrographs were  
354 collected on a ThermoFisher Titan Krios G3i microscope in the Center for Structural Biology's  
355 Cryo-EM Facility at Vanderbilt. The microscope was operated at 300 keV and equipped with a  
356 ThermoFisher Falcon3 direct electron detector camera. The nominal magnification used during  
357 data collection was 120,000x, and the pixel size was  $0.6811\text{\AA}/\text{pix}$ . The total electron dose was  
358  $50e^-/A^2$ , and micrographs were collected at  $\pm 30^\circ$  tilts. Data collection was accomplished using  
359 EPU (ThermoFisher). Images were motion corrected using MotionCor2. The CTF of each  
360 micrograph was determined using Gctf; defocus values for the data varied between  $-0.8$  and  
361  $-2.6\mu\text{m}$ . RELION-3 was used for all image processing unless otherwise indicated.

362  
363 *CryoEM data processing*

364 *Heterotrimer.* Data giving rise to our published retromer reconstruction (40) lacked tilted views;  
365 an additional data set (data collection #3) was collected to add tilted views and to improve the  
366 reconstruction for this study. Several thousand particles were manually selected from dataset #3  
367 to perform initial 2D classification and produce templates for autopicking. Template-based

368 autopicking in RELION identified 207,026 particles, which were subjected to initial 2D and 3D  
369 classification and refinement as well as CTF refinement. 250,500 particles from data collections  
370 #1 and #2 were imported to combine with data collection #3. Multiple rounds of 2D  
371 classification yielded 72,795 particles suitable to continue to 3D classification. Initial models for  
372 3D classification were filtered to 60 Å resolution for use in these experiments. The particles  
373 underwent multiple rounds of CTF refinement and Bayesian polishing to produce a final set of  
374 43,808 particles suitable for 3D refinement and postprocessing. The final masked heterotrimer  
375 model had a global resolution of 4.9 Å and a B-factor of -114 as determined in RELION.

376

377 *VPS35/VPS35 sub-structure from retromer chains.* Particles from the dataset containing all three  
378 data collections were windowed to a smaller box size that centered on the 35/35 interaction  
379 between two retromer molecules. Multiple rounds of 2D classification yielded 121,876 particles  
380 suitable to continue to 3D classification. Initial models for 3D classification were filtered to 60 Å  
381 resolution for use in these experiments. The particles underwent multiple rounds of CTF  
382 refinement and Bayesian polishing to produce a final set of 69,381 particles suitable for 3D  
383 refinement and postprocessing. The final masked flat substructure model had a global resolution  
384 of 4.5 Å and a B-factor of -226 as determined in RELION.

385

386 *Retromer dimers of trimers.* Several thousand particles were manually selected to perform initial  
387 2D and 3D classifications. Micrographs were then autopicked using a 20 Å low-pass filtered 3D  
388 model produced from initial rounds of manual picking; this template-based autopicking  
389 identified 533,231 particles. Multiple rounds of 2D classification yielded 509,447 particles  
390 suitable to continue to 3D classification. The same 3D model used for autopicking was filtered to  
391 60 Å and used as an initial model for 3D classification. The particles underwent CTF refinement  
392 to produce a final set of 208,247 particles suitable for 3D refinement. The final masked dimer  
393 model had a global resolution of 7.0 Å, and no B-factor sharpening (postprocessing) was  
394 performed in RELION. We generated a z-flipped model of the dimer in Chimera (64). We then  
395 used the Chimera command “Fit in Map” to perform a global search testing 3000 random  
396 orientations of our real space refined heterotrimer model filtered to 7 Å, with random  
397 displacement of 5 Å into each map. We generated a list of possible fits with cross-correlations for  
398 both the z-flipped and unflipped maps of the dimer.

399

400 *Dimer substructure.* The particles contained in the refined set from the full dimer were  
401 windowed to a smaller box size that centered on the VPS35/VPS35 interaction between two  
402 retromer molecules. Multiple rounds of 2D classification yielded 288,246 particles suitable to  
403 continue to 3D classification. A windowed model of the refined full dimer structure was filtered  
404 to 60 Å and used as an initial model for 3D classification. A set of 268,764 particles continued to  
405 3D refinement, and the final masked dimer substructure model had a resolution of 6.5 Å; no B-  
406 factor sharpening (postprocessing) was performed in RELION.

407

408 *Retromer 3KE mutant (f-hole).* Micrographs were autopicked using a 20 Å low-pass filtered 3D  
409 model that had been produced in early rounds of processing, and this template-based autopicking  
410 identified 275,633 particles. Multiple rounds of 2D classification yielded 154,553 particles  
411 suitable to continue to 3D classification. The same 3D model used for autopicking was filtered to  
412 60 Å and used as an initial model for 3D classification. The particles underwent CTF refinement  
413 to produce a final set of 40,957 particles suitable for 3D refinement. The final masked model  
414 exhibited a resolution of 7.1 Å; no B-factor sharpening (postprocessing) was performed in  
415 RELION. To analyze map handedness, a z-flipped model of the retromer 3KE particle was  
416 generated in Chimera (Pettersen et al., 2004). We performed a global search testing 3,000  
417 random orientations of the real space refined heterotrimer model (VPS26/VPS35/VPS29 as a  
418 single rigid body) filtered to 7 Å using the Chimera command “Fit in Map”, with random  
419 displacement of 5 Å into each map. This approach generated a list of potential fits with cross-  
420 correlations for both maps. Analyzing both maps with fitted rigid body models in Chimera  
421 clearly demonstrated the map with correct handedness.

422

423 *Retromer 3KE (f-hole) substructure.* The particles contained in the refined set from the full F-  
424 hole were windowed to a smaller box size that centered on the 35/26 tails of the two retromer  
425 molecules. Multiple rounds of 2D classification yielded 19,386 particles suitable to continue to  
426 3D classification. A windowed model of the refined full f-hole structure was filtered to 60Å and  
427 used as an initial model for 3D classification. A set of 40,957 particles continued to 3D  
428 refinement, and the final masked f-hole substructure model had a resolution of 6.7Å; no B-factor  
429 sharpening (postprocessing) was performed in RELION.

430 *Model Building & Docking.* Models for VPS29 and the VPS35 C-terminus were obtained from  
431 PDB 2R17, while models for N-VPS35 and VPS26A were obtained from PDB 5F0J. We omitted  
432 a flexible unstructured loop (amino acids 470-482) that is absent in all crystal structures. Rigid-  
433 body docking and map visualization were performed in Chimera using the command “Fit in  
434 Map”.

435

436 *Retromer heterotrimer map sharpening.* We used the 5 Å resolution Coulomb potential map to  
437 refine an atomic model of retromer. The Coulomb potential map was further postprocessed in  
438 PHENIX by performing global or local B factor sharpening using the program “Auto-  
439 sharpening” with a resolution cut-off at 5 Å. A PDB model containing all three retromer subunits  
440 (VPS26 and VPS35 from PDB: 5F0J; VPS29 from PDB: 2R17) was docked into the sharpened  
441 map and traced manually in Coot. Subsequently, several rounds of real space refinement were  
442 performed in PHENIX (65). Overall statistics and geometry for the final model were analyzed  
443 using MolProbity (66, 67) and are summarized in Table 2. The overall root-mean-square  
444 deviation (RMSD) between  $C_{\alpha}$  atoms in the refined versus starting models was 1.1 Å. However,  
445 the overall geometric parameters of  $C_{\alpha}$  atoms are improved in the new model, suggesting the side  
446 chains likely occupy more favorable conformations in the new model. While overall  
447 improvements in the model appear relatively small, the overall improvement in the sharpened  
448 map is substantial, showing that with current tools a cryo-EM map of modest quality at 5 Å  
449 resolution can be used to generate a fairly reliable model (Figure 1).

450

451 *Data visualization.* All figures were generated using CCP4MG (68) or Chimera (64).

452

453 *Data deposition.* Coulomb potential maps were deposited in the EMDB with accession numbers  
454 EMD-24964, EMD-26342, and EMD-26341, corresponding to retromer heterotrimer; dimers;  
455 and 3KE mutant particles. Sub-structure maps were deposited for C-VPS35 dimers as EMD-  
456 26343 and EMD-26345, and for the 3KE mutant as EMD-26340. The heterotrimer data set was  
457 first reported very briefly in (44), but its refinement and analysis are reported here. Coordinates  
458 for this updated retromer heterotrimer were deposited in the Protein Data Bank as XXXX.

459

460

461 **Acknowledgements**

462 The authors thank Kevin Chen and Brett Collins for generously providing the RT-L4 peptide  
463 used in 3KE retromer sample preparation and data collection. AKK, MC, BX, and LPJ are  
464 supported by NIH R35GM119525. WW is supported by NIH DP2GM146321. Screening was  
465 conducted at the Center for Structural Biology Cryo-EM Facility at Vanderbilt University. Data  
466 collection was performed at the National Center for CryoEM Access and Training (NCCAT) and  
467 the Simons Electron Microscopy Center located at the New York Structural Biology Center,  
468 supported by the NIH Common Fund Transformative High Resolution Cryo-Electron  
469 Microscopy program (U24 GM129539) and by grants from the Simons Foundation (SF349247)  
470 and NY State Assembly. The authors declare that they have no conflicts of interest with the  
471 contents of this article.

472

473



474 **References**

- 475 1. M. N. Seaman, J. M. McCaffery, S. D. Emr, A Membrane Coat Complex Essential for  
476 Endosome-to-Golgi Retrograde Transport in Yeast. *J Cell Biol.* **142**, 665–81 (1998).
- 477 2. M. N. J. Seaman, Cargo-selective endosomal sorting for retrieval to the Golgi requires  
478 retromer. *J Cell.* **165**, 111–22 (2004).
- 479 3. C. N. Arighi, L. M. Hartnell, R. C. Aguilar, C. R. Haft, J. S. Bonifacino, Role of the  
480 mammalian retromer in sorting of the cation-independent mannose 6-phosphate receptor.  
481 *J. Cell Biol.* **165**, 123–33 (2004).
- 482 4. B. E. L. Lauffer, C. Melero, P. Temkin, C. Lei, W. Hong, T. Kortemme, M. von Zastrow,  
483 SNX27 mediates PDZ-directed sorting from endosomes to the plasma membrane. *J Cell*  
484 *Biol.* **190**, 565–74 (2010).
- 485 5. P. Temkin, B. Lauffer, S. Jäger, P. Cimermancic, N. J. Krogan, M. von Zastrow, SNX27  
486 mediates retromer tubule entry and endosome-to-plasma membrane trafficking of  
487 signalling receptors. *Nat. Cell Biol.* **13**, 715–21 (2011).
- 488 6. F. Steinberg, M. Gallon, M. Winfield, E. C. Thomas, A. J. Bell, K. J. Heesom, J. M.  
489 Tavaré, P. J. Cullen, A global analysis of SNX27-retromer assembly and cargo specificity  
490 reveals a function in glucose and metal ion transport. *Nat Cell Biol.* **15**, 461–71 (2013).
- 491 7. R. W.-Y. Choy, M. Park, P. Temkin, B. E. Herring, A. Marley, R. A. Nicoll, M. von  
492 Zastrow, Retromer mediates a discrete route of local membrane delivery to dendrites.  
493 *Neuron.* **82**, 55–62 (2014).
- 494 8. C. G. Burd, P. J. Cullen, Retromer: a master conductor of endosome sorting. *Cold Spring*  
495 *Harb Perspect Biol.* **6** (2014), doi:10.1101/cshperspect.a016774.
- 496 9. B. Simonetti, P. J. Cullen, Endosomal Sorting: Architecture of the Retromer Coat. *Curr.*  
497 *Biol.* **28**, R1350–R1352 (2018).
- 498 10. M. Chandra, A. K. Kendall, L. P. Jackson, Toward Understanding the Molecular Role of  
499 SNX27/Retromer in Human Health and Disease. *Front. Cell Devel Biol.* **9**, 642378  
500 (2021).
- 501 11. L. Lu, W. Hong, From endosomes to the trans-Golgi network. *Sem Cell Dev Biol.* **31**, 30–  
502 9 (2014).
- 503 12. A. Fjorback, M. Seaman, C. Gustafsen, A. Mehmedbasic, S. Gokool, C. Wu, D. Miltz, V.  
504 Schmidt, P. Madsen, Nyengaard, T. Willnow, E. Christensen, W. Mobley, A. Nykjær, O.

- 505 Andersen, Retromer binds the FANSHY sorting motif in SorLA to regulate amyloid  
506 precursor protein sorting and processing. *J Neurosci.* **32**, 1467–80 (2012).
- 507 13. O. M. Andersen, J. Reiche, V. Schmidt, M. Gotthardt, R. Spoelgen, J. Behlke, C. A. F.  
508 von Arnim, T. Breiderhoff, P. Jansen, X. Wu, K. R. Bales, R. Cappai, C. L. Masters, J.  
509 Gliemann, E. J. Mufson, B. T. Hyman, S. M. Paul, A. Nykjaer, T. E. Willnow, Neuronal  
510 sorting protein-related receptor sorLA/LR11 regulates processing of the amyloid precursor  
511 protein. *Proc Natl Acad Sci U S A.* **102**, 13461–6 (2005).
- 512 14. J. Yin, X. Liu, Q. He, L. Zhou, Z. Yuan, S. Zhao, Vps35-dependent recycling of Trem2  
513 regulates microglial function. *Traffic.* **17**, 1286–1296 (2016).
- 514 15. C. Reitz, S. Tokuhira, L. N. Clark, C. Conrad, J.-P. Vonsattel, L.-N. Hazrati, A. Palotás,  
515 R. Lantigua, M. Medrano, I. Z. Jiménez -Velázquez, B. Vardarajan, I. Simkin, J. L.  
516 Haines, M. A. Pericak -Vance, L. A. Farrer, J. H. Lee, E. Rogaeva, P. St. George- Hyslop,  
517 R. Mayeux, SORCS1 alters amyloid precursor protein processing and variants may  
518 increase Alzheimer’s disease risk. *Ann. Neurol.* **69**, 47–64 (2011).
- 519 16. V. J. Mecozzi, D. E. Berman, S. Simoes, C. Vetanovetz, M. R. Awal, V. M. Patel, R. T.  
520 Schneider, G. a Petsko, D. Ringe, S. a Small, Pharmacological chaperones stabilize  
521 retromer to limit APP processing. *Nat Chem Biol.* **10**, 443–9 (2014).
- 522 17. S. A. Small, K. Kent, A. Pierce, C. Leung, M. S. Kang, H. Okada, L. Honig, J.-P.  
523 Vonsattel, T.-W. Kim, Model-guided microarray implicates the retromer complex in  
524 Alzheimer’s disease. *Ann. Neurol.* **58**, 909–19 (2005).
- 525 18. A. Zimprich, A. Benet-Pagès, W. Struhal, E. Graf, S. H. Eck, M. N. Offman, D.  
526 Haubenberger, S. Spielberger, E. C. Schulte, P. Lichtner, S. C. Rossle, N. Klopp, E. Wolf,  
527 K. Seppi, W. Pirker, S. Presslauer, B. Mollenhauer, R. Katzenschlager, T. Foki, C. Hotzy,  
528 E. Reinthaler, A. Harutyunyan, R. Kralovics, A. Peters, F. Zimprich, T. Brücke, W.  
529 Poewe, E. Auff, C. Trenkwalder, B. Rost, G. Ransmayr, J. Winkelmann, T. Meitinger, T.  
530 M. Strom, A mutation in VPS35, encoding a subunit of the retromer complex, causes late-  
531 onset Parkinson disease. *Am J Hum Genet.* **89**, 168–75 (2011).
- 532 19. M. E. Curtis, D. Yu, D. Praticò, Dysregulation of the Retromer Complex System in Down  
533 Syndrome. *Ann. Neurol.* **88**, 137–147 (2020).
- 534 20. A. Filippone, D. Praticò, Endosome Dysregulation in Down Syndrome: A Potential  
535 Contributor to Alzheimer Disease Pathology. *Ann. Neurol.* **90**, 4–14 (2021).

- 536 21. M. Romano-Moreno, A. L. Rojas, C. D. Williamson, D. C. Gershlick, M. Lucas, M. N.  
537 Isupov, J. S. Bonifacino, M. P. Machner, A. Hierro, Molecular mechanism for the  
538 subversion of the retromer coat by the Legionella effector RidL. *Proc Natl Acad Sci U S*  
539 *A.* **114**, E11151–E11160 (2017).
- 540 22. Z. Daniloski, T. X. Jordan, H.-H. Wessels, D. A. Hoagland, S. Kasela, M. Legut, S.  
541 Maniatis, E. P. Mimitou, L. Lu, E. Geller, O. Danziger, B. R. Rosenberg, H. Phatnani, P.  
542 Smibert, T. Lappalainen, B. R. TenOever, N. E. Sanjana, Identification of Required Host  
543 Factors for SARS-CoV-2 Infection in Human Cells. *Cell.* **184**, 92-105.e16 (2021).
- 544 23. E. Sztul, P.-W. Chen, J. E. Casanova, J. Cherfils, J. B. Dacks, D. G. Lambright, F.-J. S.  
545 Lee, P. A. Randazzo, L. C. Santy, A. Schürmann, I. Wilhelmi, M. E. Yohe, R. A. Kahn,  
546 ARF GTPases and their GEFs and GAPs: concepts and challenges. *Mol. Biol. Cell.* **30**,  
547 1249–1271 (2019).
- 548 24. M. Chandra, A. K. Kendall, L. P. Jackson, Unveiling the cryo-EM structure of retromer.  
549 *Biochem. Soc. Trans.* **48** (2020), doi:10.1042/BST20200552.
- 550 25. C. N. Arighi, L. M. Hartnell, R. C. Aguilar, C. R. Haft, J. S. Bonifacino, Role of the  
551 mammalian retromer in sorting of the cation-independent mannose 6-phosphate receptor.  
552 *J Cell Biol.* **165**, 123–33 (2004).
- 553 26. S. F. Nothwehr, S. A. Ha, P. Bruinsma, Sorting of yeast membrane proteins into an  
554 endosome-to-Golgi pathway involves direct interaction of their cytosolic domains with  
555 Vps35p. *J Cell Biol.* **151**, 297–309 (2000).
- 556 27. A. Kvainickas, A. Jimenez-Orgaz, H. Nägele, Z. Hu, J. Dengjel, F. Steinberg, Cargo-  
557 selective SNX-BAR proteins mediate retromer trimer independent retrograde transport. *J*  
558 *Cell Biol.* **216**, 3677–3693 (2017).
- 559 28. B. Simonetti, B. Paul, K. Chaudhari, S. Weeratunga, F. Steinberg, M. Gorla, K. J.  
560 Heesom, G. J. Bashaw, B. M. Collins, P. J. Cullen, Molecular identification of a BAR  
561 domain-containing coat complex for endosomal recycling of transmembrane proteins. *Nat*  
562 *Cell Biol.* **21**, 1219–1233 (2019).
- 563 29. M. S. Harrison, C.-S. Hung, T. Liu, R. Christiano, T. C. Walther, C. G. Burd, A  
564 mechanism for retromer endosomal coat complex assembly with cargo. *Proc Natl Acad*  
565 *Sci U S A.* **111**, 267–72 (2014).
- 566 30. B. D. M. Bean, M. Davey, E. Conibear, Cargo selectivity of yeast sorting nexins. *Traffic.*

- 567           **18**, 110–122 (2017).
- 568   31.   M. Lucas, D. C. Gershlick, A. Vidaurrazaga, A. L. Rojas, J. S. Bonifacino, A. Hierro,  
569           Structural Mechanism for Cargo Recognition by the Retromer Complex. *Cell*. **167**, 1623-  
570           1635.e14 (2016).
- 571   32.   O. Kovtun, N. Leneva, Y. S. Bykov, N. Ariotti, R. D. Teasdale, M. Schaffer, B. D. Engel,  
572           D. J. Owen, J. A. G. Briggs, B. M. Collins, Structure of the membrane-assembled retromer  
573           coat determined by cryo-electron tomography. *Nature*. **561**, 561–564 (2018).
- 574   33.   N. Leneva, O. Kovtun, D. R. Morado, J. A. G. Briggs, D. J. Owen, Architecture and  
575           mechanism of metazoan retromer:SNX3 tubular coat assembly. *Sci. Adv.* **7** (2021),  
576           doi:10.1126/sciadv.abf8598.
- 577   34.   J. Carlton, M. Bujny, B. J. Peter, V. M. J. Oorschot, A. Rutherford, H. Mellor, J.  
578           Klumperman, H. T. McMahon, P. J. Cullen, Sorting nexin-1 mediates tubular endosome-  
579           to-TGN transport through coincidence sensing of high- curvature membranes and 3-  
580           phosphoinositides. *Curr Biol*. **14**, 1791–800 (2004).
- 581   35.   B. Simonetti, C. M. Danson, K. J. Heesom, P. J. Cullen, Sequence-dependent cargo  
582           recognition by SNX-BARs mediates retromer-independent transport of CI-MPR. *J Cell*  
583           *Biol*. **216**, 3695–3712 (2017).
- 584   36.   T. I. Strohlic, T. G. Setty, A. Sitaram, C. G. Burd, Grd19/Snx3p functions as a cargo-  
585           specific adapter for retromer-dependent endocytic recycling. *J Cell Biol*. **177**, 115–25  
586           (2007).
- 587   37.   A. Hierro, A. L. Rojas, R. Rojas, N. Murthy, G. Effantin, A. V. Kajava, A. C. Steven, J. S.  
588           Bonifacino, J. H. Hurley, Functional architecture of the retromer cargo-recognition  
589           complex. *Nature*. **449**, 1063–7 (2007).
- 590   38.   B. M. Collins, C. F. Skinner, P. J. Watson, M. N. Seaman, D. J. Owen, Vps29 has a  
591           phosphoesterase fold that acts as a protein interaction scaffold for retromer assembly. *Nat*  
592           *Struct Mol Biol*. **12**, 594–602 (2005).
- 593   39.   B. M. Collins, S. J. Norwood, M. C. Kerr, D. Mahony, M. N. J. Seaman, R. D. Teasdale,  
594           D. J. Owen, Structure of Vps26B and mapping of its interaction with the retromer protein  
595           complex. *Traffic*. **9**, 366–79 (2008).
- 596   40.   A. K. Kendall, B. Xie, P. Xu, J. Wang, R. Burcham, M. N. Frazier, E. Binshtein, H. Wei,  
597           T. R. Graham, T. Nakagawa, L. P. Jackson, Mammalian Retromer Is an Adaptable

- 598 Scaffold for Cargo Sorting from Endosomes. *Structure*. **28**, 393-405.e4 (2020).
- 599 41. H. Shi, R. Rojas, J. S. Bonifacino, J. H. Hurley, The retromer subunit Vps26 has an  
600 arrestin fold and binds Vps35 through its C-terminal domain. *Nat Struct Mol Biol*. **13**,  
601 540–548 (2006).
- 602 42. K. E. McNally, R. Faulkner, F. Steinberg, M. Gallon, R. Ghai, D. Pim, P. Langton, N.  
603 Pearson, C. M. Danson, H. Nägele, L. L. Morris, A. Singla, B. L. Overlee, K. J. Heesom,  
604 R. Sessions, L. Banks, B. M. Collins, I. Berger, D. D. Billadeau, E. Burstein, P. J. Cullen,  
605 Retriever is a multiprotein complex for retromer-independent endosomal cargo recycling.  
606 *Nat Cell Biol*. **19**, 1214–1225 (2017).
- 607 43. D. Wang, M. Guo, Z. Liang, J. Fan, Z. Zhu, J. Zang, X. Li, M. Teng, L. Niu, Y. Dong, P.  
608 Liu, Crystal structure of human vacuolar protein sorting protein 29 reveals a  
609 phosphodiesterase/nuclease-like fold and two protein-protein interaction sites. *J Biol*  
610 *Chem*. **280**, 22962–22967 (2005).
- 611 44. K.-E. Chen, Q. Guo, T. A. Hill, Y. Cui, A. K. Kendall, Z. Yang, R. J. Hall, M. D. Healy, J.  
612 Sacharz, S. J. Norwood, S. Fonseka, B. Xie, R. C. Reid, N. Leneva, R. G. Parton, R. Ghai,  
613 D. A. Stroud, D. P. Fairlie, H. Suga, L. P. Jackson, R. D. Teasdale, T. Passioura, B. M.  
614 Collins, De novo macrocyclic peptides for inhibiting, stabilizing, and probing the function  
615 of the retromer endosomal trafficking complex. *Sci. Adv*. **7**, eabg4007 (2021).
- 616 45. S. J. Norwood, D. J. Shaw, N. P. Cowieson, D. J. Owen, R. D. Teasdale, B. M. Collins,  
617 Assembly and solution structure of the core retromer protein complex. *Traffic*. **12**, 56–71  
618 (2010).
- 619 46. B. J. Greber, J. Remis, S. Ali, E. Nogales, 2.5 Å-resolution structure of human CDK-  
620 activating kinase bound to the clinical inhibitor ICEC0942. *Biophys. J*. **120**, 677–686  
621 (2021).
- 622 47. W. Wan, L. Kolesnikova, M. Clarke, A. Koehler, T. Noda, S. Becker, J. A. G. Briggs,  
623 Structure and assembly of the Ebola virus nucleocapsid. *Nature*. **551**, 394–397 (2017).
- 624 48. E. Krissinel, K. Henrick, Inference of macromolecular assemblies from crystalline state. *J*  
625 *Mol Biol*. **372**, 774–797 (2007).
- 626 49. E. Braschi, V. Goyon, R. Zunino, A. Mohanty, L. Xu, H. M. McBride, Vps35 mediates  
627 vesicle transport between the mitochondria and peroxisomes. *Curr Biol*. **20**, 1310–1315  
628 (2010).

- 629 50. T. Farmer, K. L. O'Neill, N. Naslavsky, X. Luo, S. Caplan, Retromer facilitates the  
630 localization of Bcl-xL to the mitochondrial outer membrane. *Mol Biol Cell.* **30**, 1138–  
631 1146 (2019).
- 632 51. A. Kvainickas, H. Nägele, W. Qi, L. Dokládál, A. Jimenez-Orgaz, L. Stehl, D. Gangurde,  
633 Q. Zhao, Z. Hu, J. Dengjel, C. De Virgilio, R. Baumeister, F. Steinberg, Retromer and  
634 TBC1D5 maintain late endosomal RAB7 domains to enable amino acid-induced  
635 mTORC1 signaling. *J Cell Biol.* **218**, 3019–3038 (2019).
- 636 52. G. G. Hesketh, F. Papazotos, J. Pawling, D. Rajendran, J. D. R. Knight, S. Martinez, M.  
637 Taipale, D. Schramek, J. W. Dennis, A.-C. Gingras, The GATOR-Rag GTPase pathway  
638 inhibits mTORC1 activation by lysosome-derived amino acids. *Science (80-. ).* **370**, 351–  
639 356 (2020).
- 640 53. S. Roy, A. M. Leidal, J. Ye, S. M. Ronen, J. Debnath, Autophagy-Dependent Shuttling of  
641 TBC1D5 Controls Plasma Membrane Translocation of GLUT1 and Glucose Uptake. *Mol*  
642 *Cell.* **67**, 84-95.e5 (2017).
- 643 54. T. Farmer, N. Naslavsky, S. Caplan, Tying trafficking to fusion and fission at the mighty  
644 mitochondria. *Traffic.* **19**, 569–577 (2018).
- 645 55. T. Courtellemont, M. G. De Leo, N. Gopaldass, A. Mayer, *bioRxiv*, in press,  
646 doi:10.1101/2021.09.06.459059.
- 647 56. K. L. Morris, J. R. Jones, M. Halebian, S. Wu, M. Baker, J.-P. Armache, A. Avila Ibarra,  
648 R. B. Sessions, A. D. Cameron, Y. Cheng, C. J. Smith, Cryo-EM of multiple cage  
649 architectures reveals a universal mode of clathrin self-assembly. *Nat Struct Mol Biol.* **26**,  
650 890–898 (2019).
- 651 57. M. Paraan, J. Mendez, S. Sharum, D. Kurtin, H. He, S. M. Stagg, The structures of  
652 natively assembled clathrin-coated vesicles. *Sci. Adv.* **6**, eaba8397 (2020).
- 653 58. W. Wang, B. A. Malcolm, Two-stage PCR protocol allowing introduction of multiple  
654 mutations, deletions and insertions using QuikChange Site-Directed Mutagenesis.  
655 *Biotechniques.* **26**, 680–682 (1999).
- 656 59. S. H. W. Scheres, RELION: implementation of a Bayesian approach to cryo-EM structure  
657 determination. *J Struct Biol.* **180**, 519–30 (2012).
- 658 60. J. Zivanov, T. Nakane, B. O. Forsberg, D. Kimanius, W. J. Hagen, E. Lindahl, S. H.  
659 Scheres, New tools for automated high-resolution cryo-EM structure determination in

- 660 RELION-3. *Elife*. **7** (2018), doi:10.7554/eLife.42166.
- 661 61. B. Carragher, N. Kisseberth, D. Kriegman, R. A. Milligan, C. S. Potter, J. Pulokas, A.  
662 Reilein, Legion: an automated system for acquisition of images from vitreous ice  
663 specimens. *J Struct Biol*. **132**, 33–45 (2000).
- 664 62. S. Q. Zheng, E. Palovcak, J.-P. Armache, K. A. Verba, Y. Cheng, D. A. Agard,  
665 MotionCor2: anisotropic correction of beam-induced motion for improved cryo-electron  
666 microscopy. *Nat. Methods*. **14**, 331–332 (2017).
- 667 63. K. Zhang, Gctf: Real-time CTF determination and correction. *J Struct Biol*. **193**, 1–12  
668 (2016).
- 669 64. E. F. Pettersen, T. D. Goddard, C. C. Huang, G. S. Couch, D. M. Greenblatt, E. C. Meng,  
670 T. E. Ferrin, UCSF Chimera--a visualization system for exploratory research and analysis.  
671 *J Comp Chem*. **25**, 1605–12 (2004).
- 672 65. P. D. Adams, P. V Afonine, G. Bunkóczi, V. B. Chen, I. W. Davis, N. Echols, J. J.  
673 Headd, L.-W. Hung, G. J. Kapral, R. W. Grosse-Kunstleve, A. J. McCoy, N. W. Moriarty,  
674 R. Oeffner, R. J. Read, D. C. Richardson, J. S. Richardson, T. C. Terwilliger, P. H. Zwart,  
675 PHENIX: a comprehensive, Python-based system for macromolecular structure solution.  
676 *Acta Cryst D*. **66**, 213–221 (2010).
- 677 66. V. B. Chen, W. B. Arendall, J. J. Headd, D. A. Keedy, R. M. Immormino, G. J. Kapral, L.  
678 W. Murray, J. S. Richardson, D. C. Richardson, MolProbity: all-atom structure validation  
679 for macromolecular crystallography. *Acta Cryst D*. **66**, 12–21 (2010).
- 680 67. C. J. Williams, J. J. Headd, N. W. Moriarty, M. G. Prisant, L. L. Videau, L. N. Deis, V.  
681 Verma, D. A. Keedy, B. J. Hintze, V. B. Chen, S. Jain, S. M. Lewis, W. B. Arendall, J.  
682 Snoeyink, P. D. Adams, S. C. Lovell, J. S. Richardson, D. C. Richardson, MolProbity:  
683 More and better reference data for improved all-atom structure validation. *Pro Sci*. **27**,  
684 293–315 (2018).
- 685 68. S. McNicholas, E. Potterton, K. S. Wilson, M. E. M. Noble, Presenting your structures:  
686 the CCP4mg molecular-graphics software. *Acta Cryst D*. **67**, 386–94 (2011).
- 687

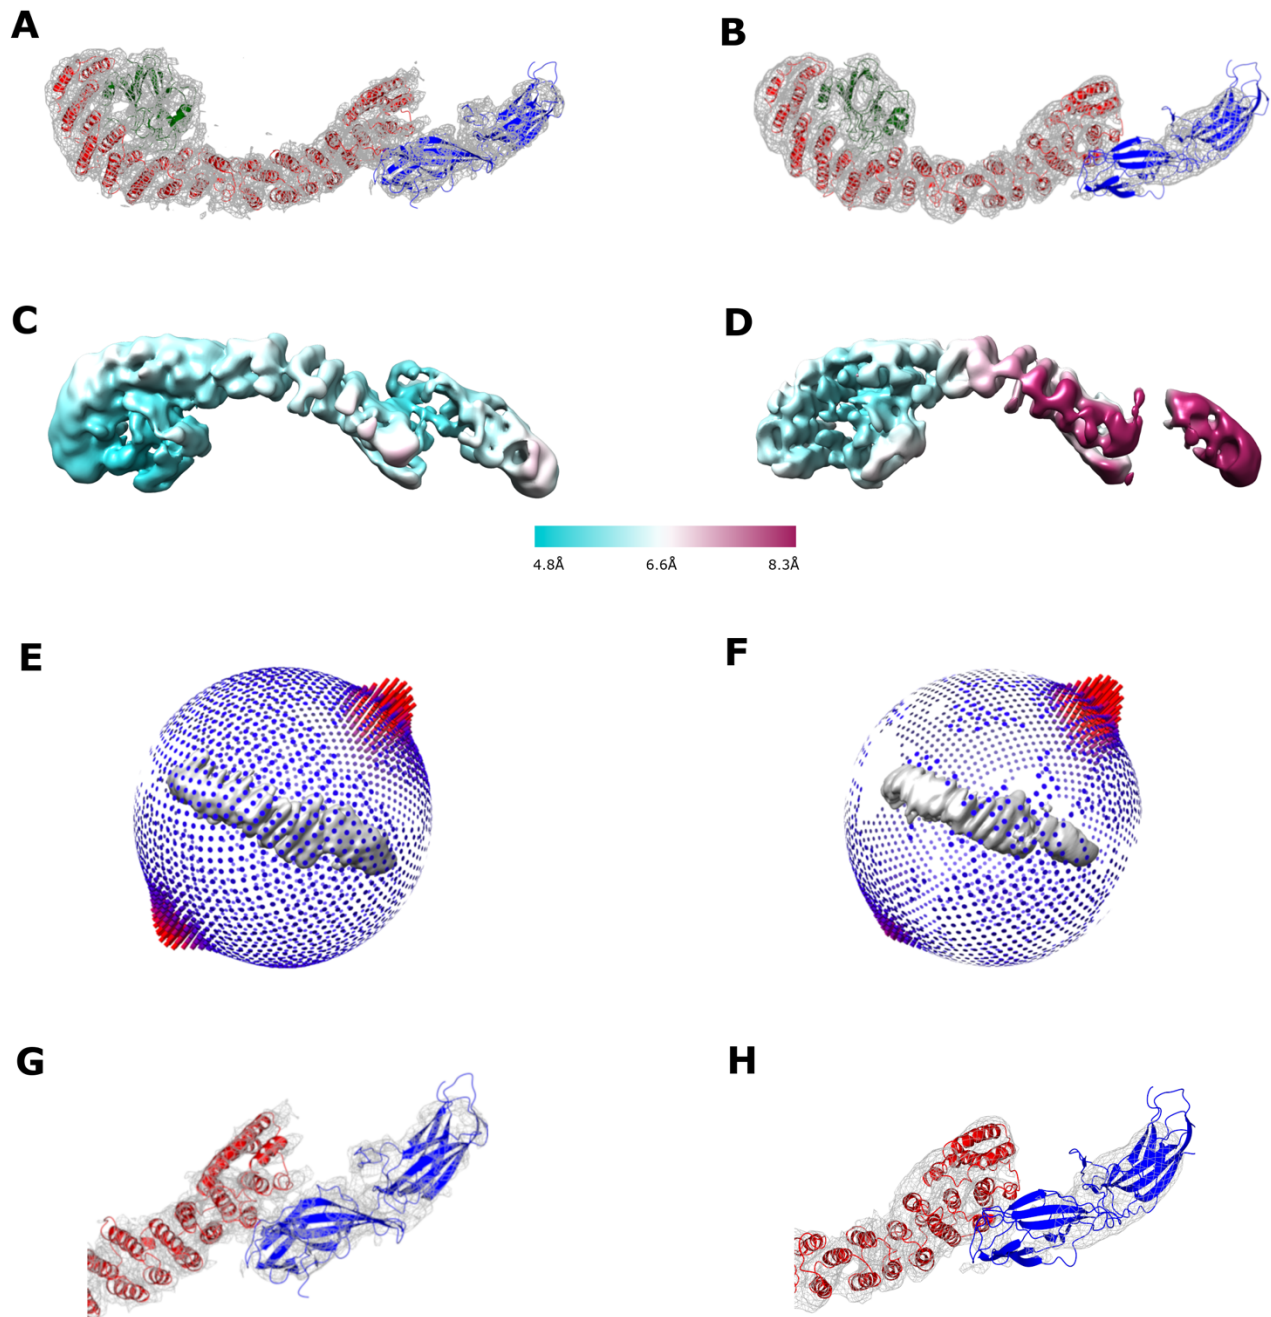

**Figure 1. Single particle reconstructions of the mammalian retromer heterotrimer.** (A, B) Comparison of new 4.9 Å resolution (A) and previously reported (B) reconstructions of retromer heterotrimer with fitted models. VPS29 is shown as green ribbons, VPS35 as red ribbons, and VPS26 as blue ribbons. (C, D) Local resolution comparisons across new (C) and reported (D) heterotrimer reconstructions. (E, F) Angular distribution in new (E) and reported (F) reconstructions. (G, H) Close-up views of N-VPS35/C-VPS26 interface in new (G) and reported (H) reconstructions. All Coulomb potential maps were generated using CCP4MG and are shown at  $5\sigma$  contour level. Overall, acquisition of tilt data and improvements in data processing (details in text) resulted in an improved model.



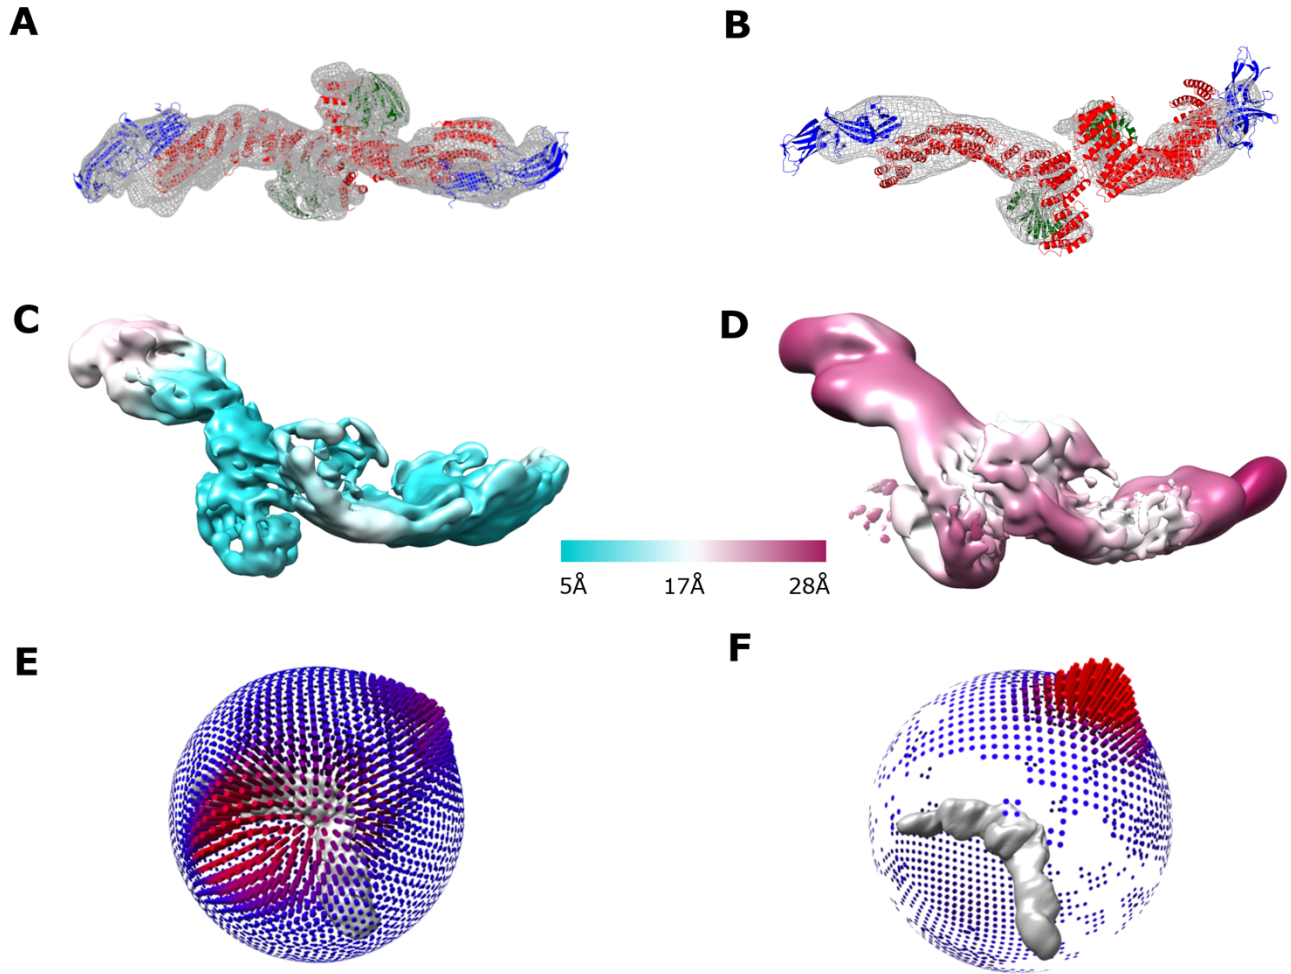

**Figure 2. Single particle reconstructions of retromer dimers of trimers.** (A, B) Comparison of new (A) and previously reported (B) reconstructions of retromer dimers of heterotrimers with fitted models. Coulomb potential maps generated using CCP4MG are shown at  $6\sigma$  (A) and  $4\sigma$  (B) contour levels, respectively. (C, D) Local resolution comparisons across new (C) and reported (D) reconstructions. (E, F) Angular distribution in new (E) and reported (F) reconstructions.

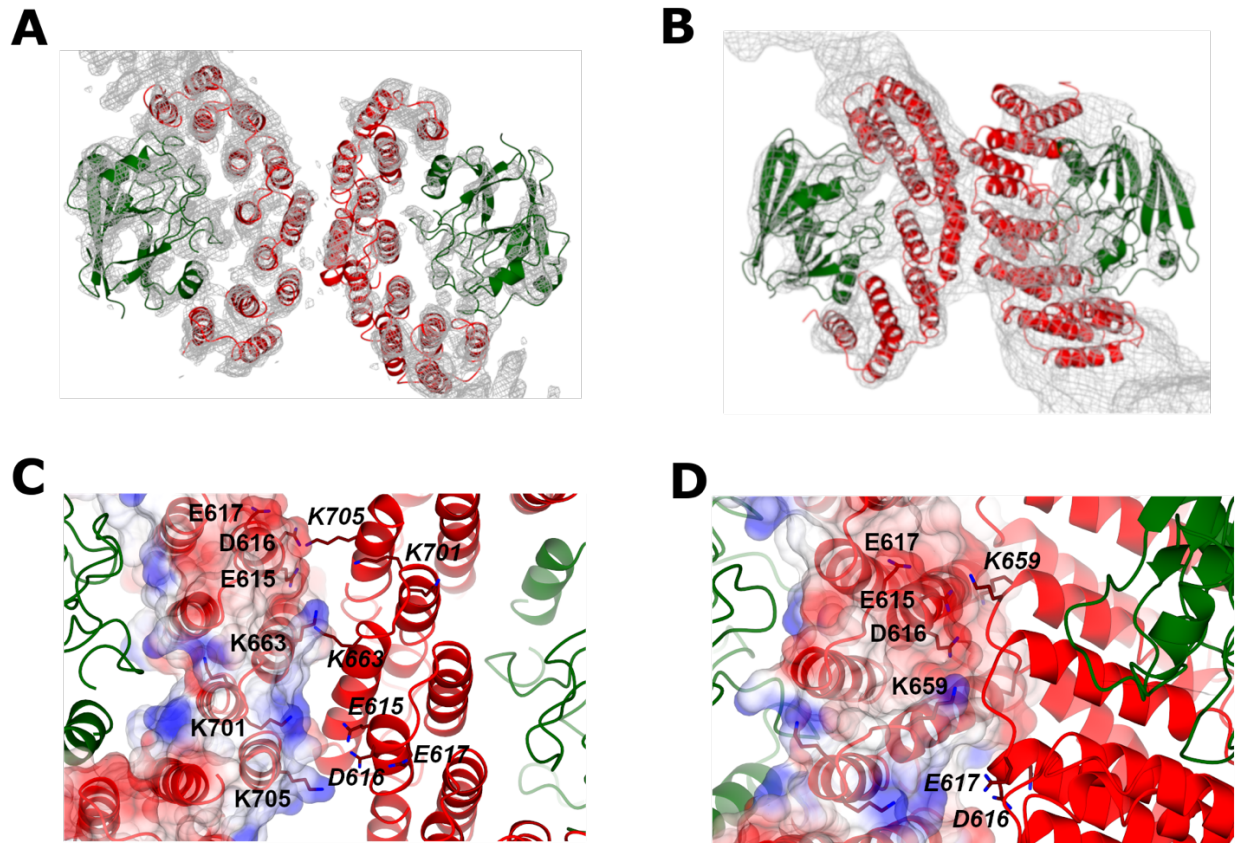

**Figure 3. VPS35/VPS35 sub-structure reconstructions.** (A) VPS35/VPS35 sub-structure interface determined from retromer chains is shown with fitted model. (B) VPS35/VPS35 sub-structure interface determined from retromer dimers of trimers (Figure 2) is shown with fitted model. Coulomb potential maps generated using CCP4MG are shown at 4 $\sigma$  (A) and 3 $\sigma$  (B) contour levels, respectively. (C, D) Close-up views of VPS35/VPS35 dimer interfaces observed in flat chains (C) and dimers of trimers (D). Improvements in data processing resulted in reconstructions with higher resolution; these structures further support the presence of specific electrostatic residues (E615, D616, E617, K663, K701, K705) mediating VPS35 dimer formation in asymmetric interfaces. Residues in the first dimer copy are labeled in black text, and residues in the second copy are labeled in black italic text.

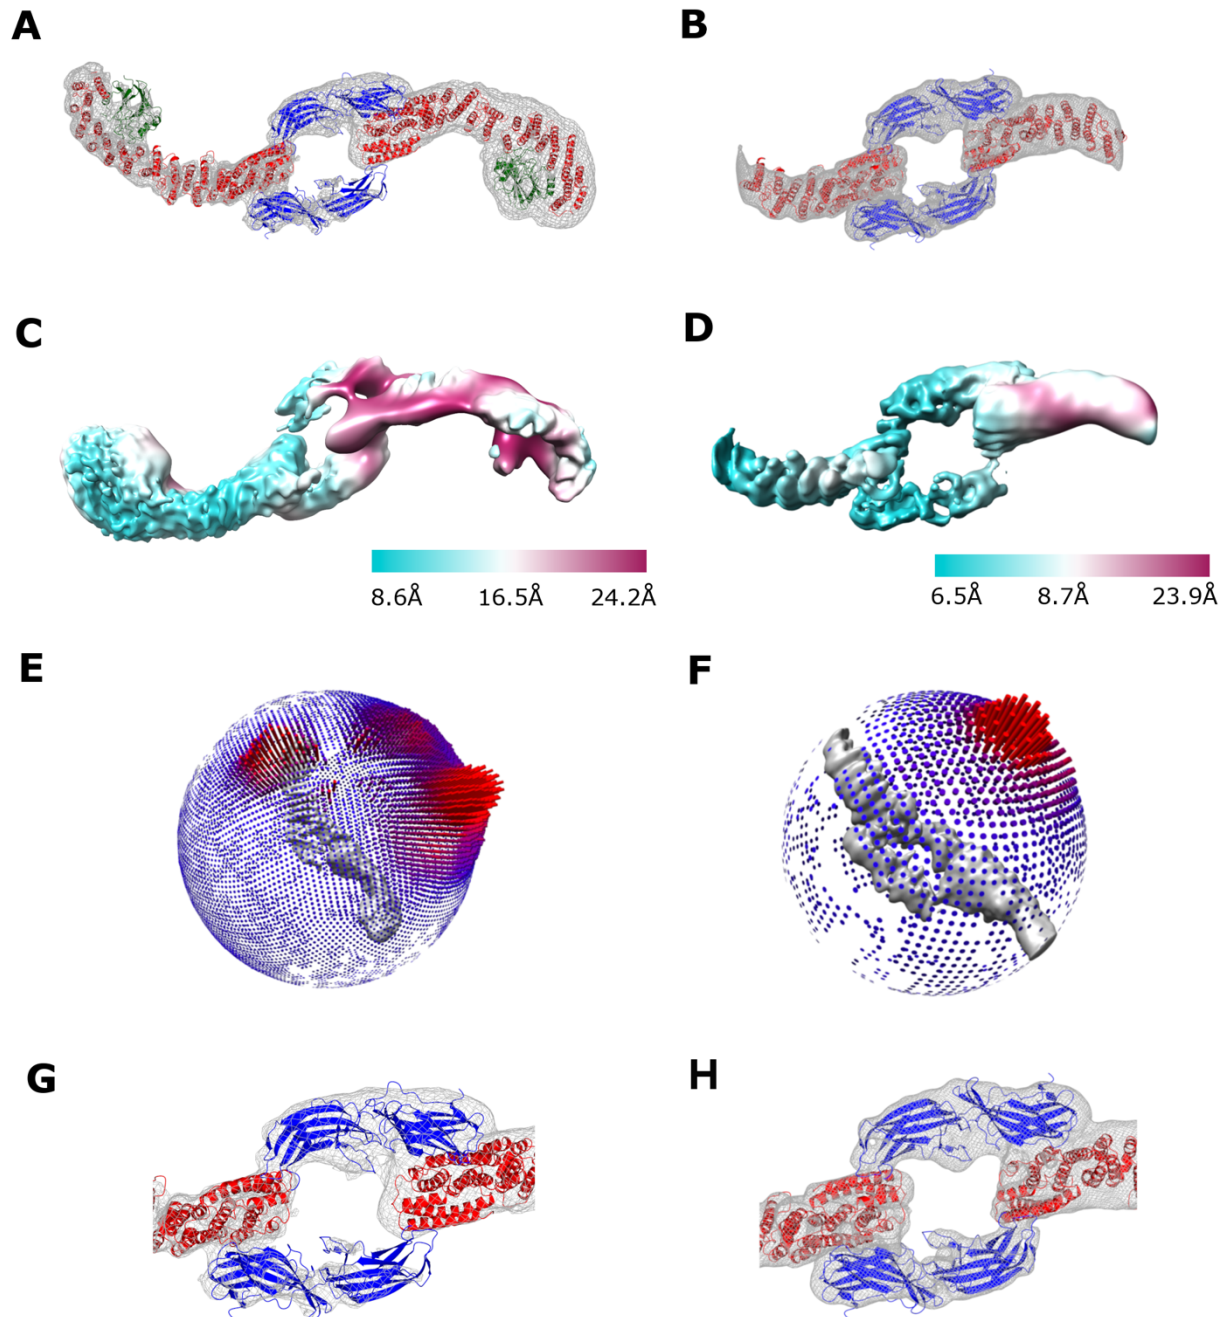

**Figure 4. Single particle reconstruction of the retromer 3KE mutant reveals a new interface.** (A, B) Reconstructions of retromer 3KE particle (A) and its sub-structure (B) centered on the “chain link” mediated by VPS26 and VPS35. Coulomb potential maps generated using CCP4MG are shown at 5 $\sigma$  (A) and 3 $\sigma$  (B) contour level. (C, D) Local resolution of 3KE mutant (C) and sub-structure. (E, F) Angular distribution of 3KE mutant (E) and sub-structure (F). (G, H) Close-up views of the newly observed VPS26/VPS35 interface, in which the N-terminal VPS26 arrestin saddle interacts with the N-terminus of a neighboring VPS35 subunit.

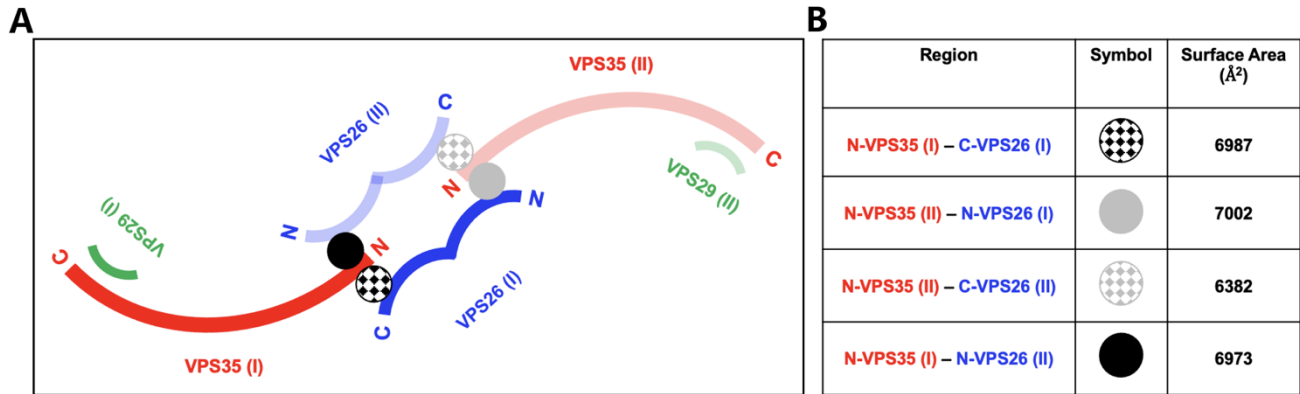

**Figure 5. Analysis of retromer 3KE particle interfaces.** (A) Schematic view of interactions observed in the retromer 3KE mutant particle. One heterotrimer is shown in dark colors (VPS29 in green, VPS35 in red, VPS26 in blue) and the second is shown in transparent colors. Within each heterotrimer, N-VPS35 binds C-VPS26A (black & grey hatched circles). Each “chain link” structure is held together by an interaction between a VPS35 N-terminus and the VPS26A N-terminal arrestin saddle in the neighboring heterotrimer (marked as black & grey circles). This interaction occurs on the opposite side from where the VPS35 N-terminus interacts with a VPS26A subunit within its own heterotrimer. (B) Summary of buried surface area analysis between VPS35 and VPS26A (calculated using PISA, full details in text).

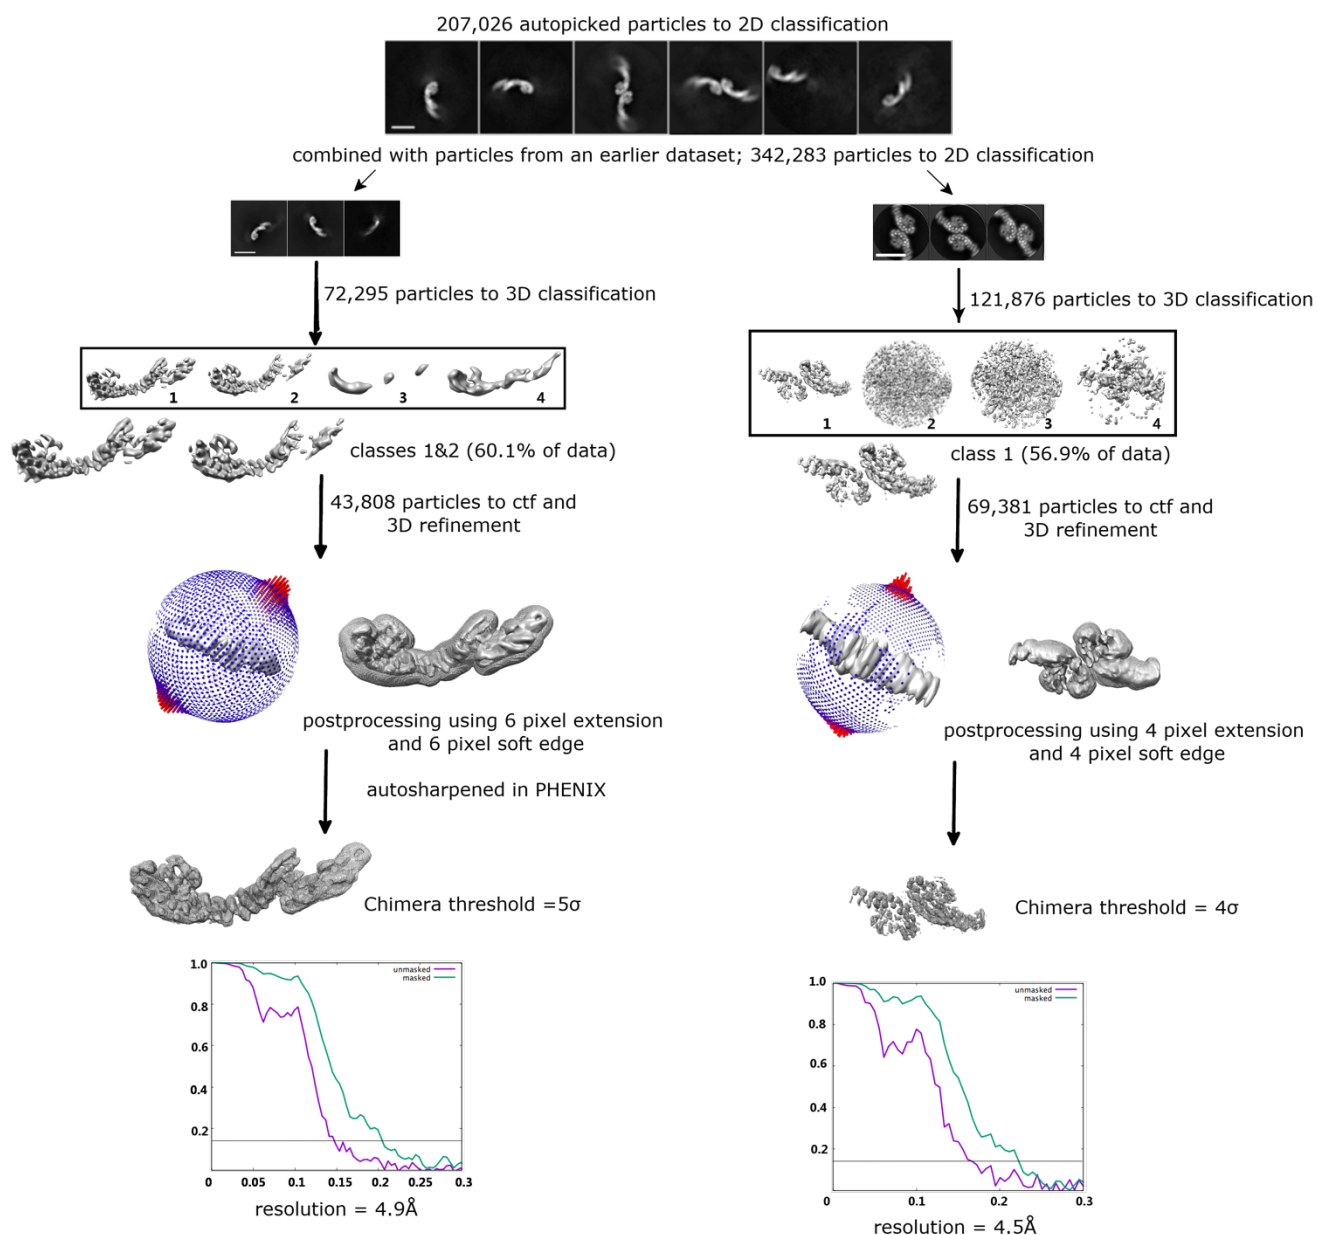

**Figure S1. CryoEM image and data processing work flow for updated retromer heterotrimer and VPS35/VPS35 sub-structure.** Particles were auto-picked from three combined datasets using a 3D starting model (details in Methods). Particles were separated into 2D classes based on biochemical species (heterotrimer, flat chains). The left branch shows data processing pipeline for heterotrimers, and the right branch shows processing for the VPS35/VPS35 sub-structure reconstructed from flat chains. 3D reconstructions were generated for each species. Fourier Shell Correlation (FSC) plots showing masked and unmasked resolution estimates from RELION are shown for each structure or sub-structure; the grey line marks the 0.143 cut-off.

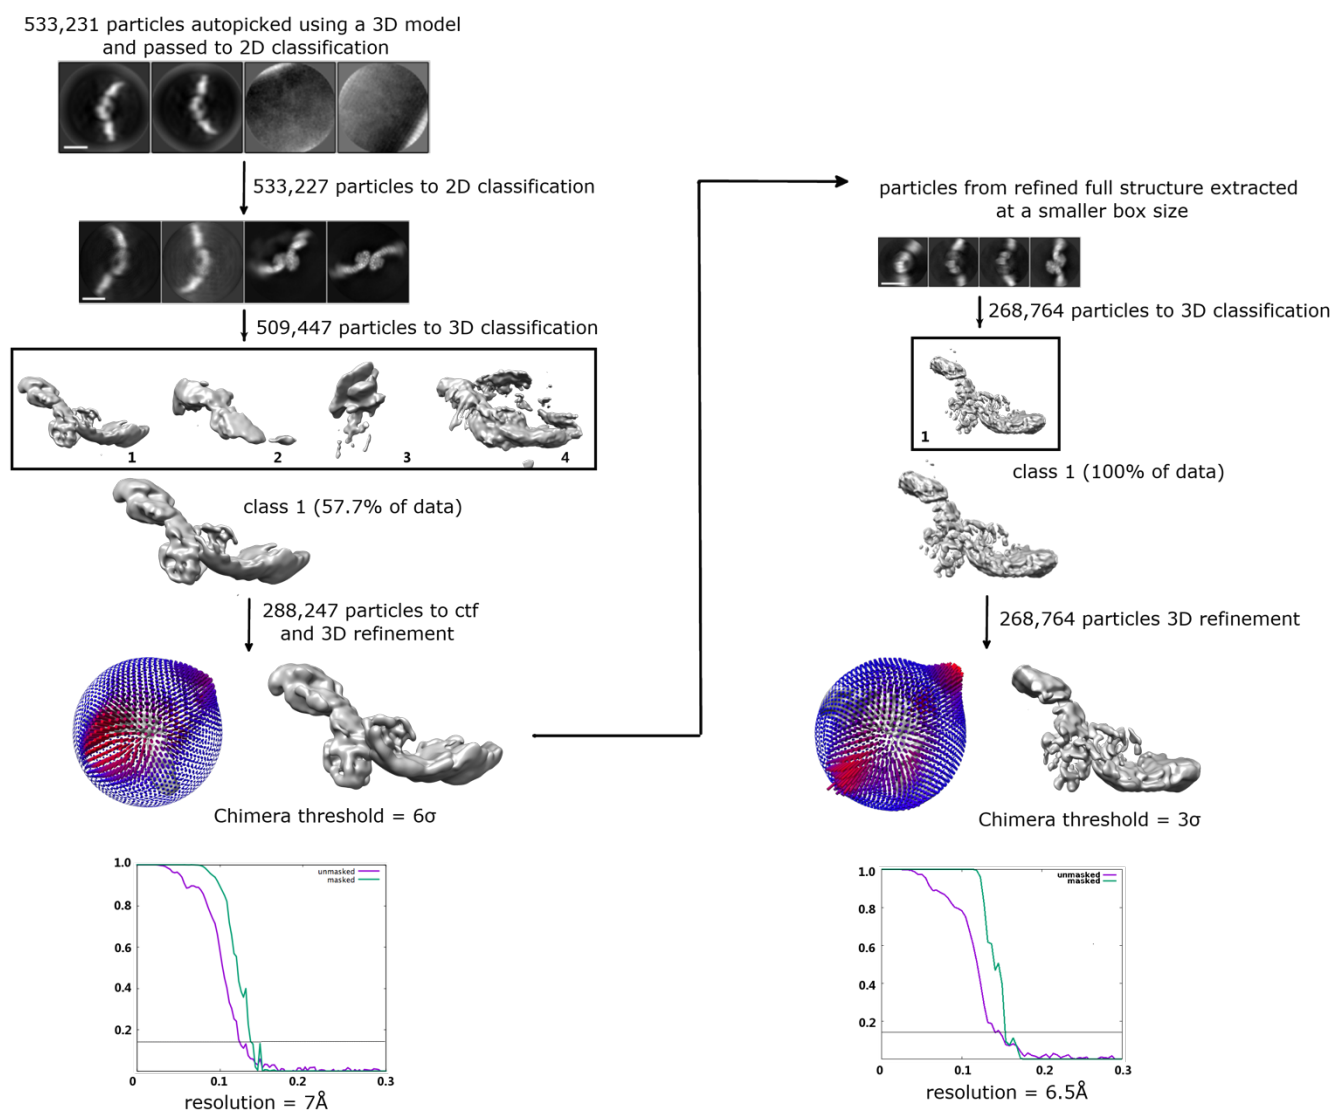

**Figure S2. CryoEM image and data processing work flow for retromer dimers and sub-structure.**

Particles were auto-picked from a published dataset (Kendall, *Structure* 2020) using a 3D starting model of the retromer heterotrimer (details in Methods). Dimer particles were separated from other species during 2D classification, and 3D reconstructions were generated for both the intact dimer (left branch) and the VPS35/VPS35 sub-structure (right branch). Fourier Shell Correlation (FSC) plots showing masked and unmasked resolution estimates from RELION are shown for each structure or sub-structure; the grey line marks the 0.143 cut-off.

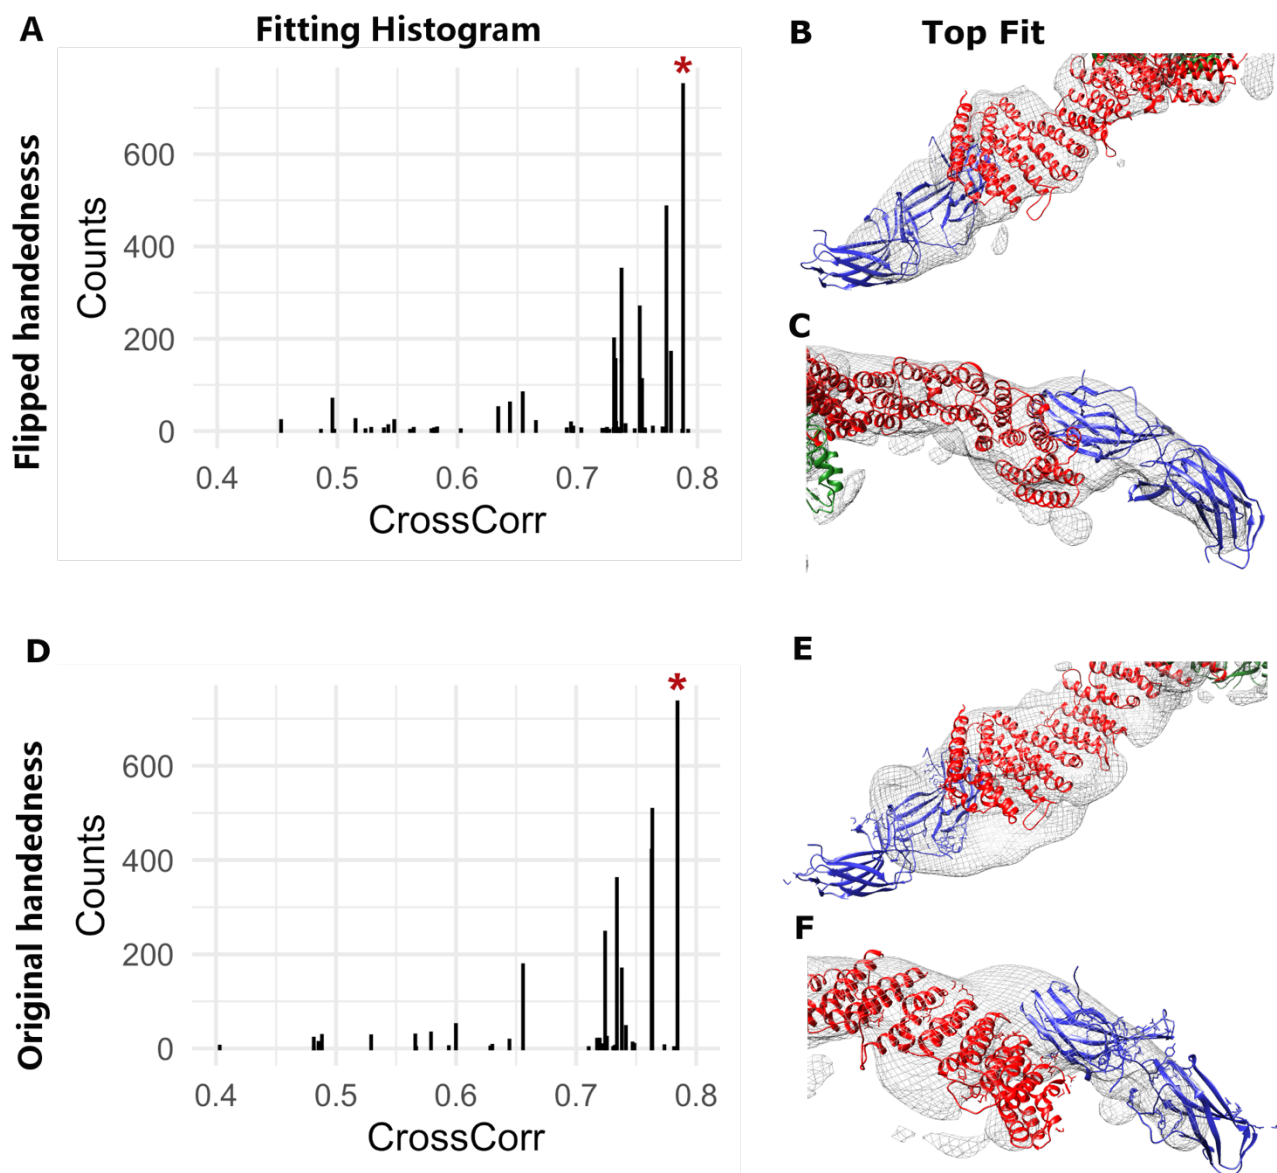

**Figure S3. Analysis of retromer dimer map handedness.** Map handedness was systematically analyzed by performing random rigid-body fits of real-space refined retromer models into each map (details in Methods). (A) Fitting histogram for flipped map handedness map showing counts of random rigid-body fits and cross-correlation values (Chimera). Magenta star marks top fit. (B,C) View of top fitted model in Coulomb potential map. Maps were generated using CCP4MG and are shown at  $6\sigma$  contour level; VPS35 in red ribbons; VPS26 in blue ribbons; VPS29 in green ribbons. (D) Fitting histogram for original map handedness showing counts of random rigid-body fits and cross-correlation values (Chimera). (E, F) View of top fitted model in Coulomb potential map. Maps were generated using CCP4MG and are shown at  $6\sigma$  contour level. This analysis suggests the flipped handedness (C, D) represents the correct handedness.

275,663 particles autopicked using 3D model and passed to 2D classification

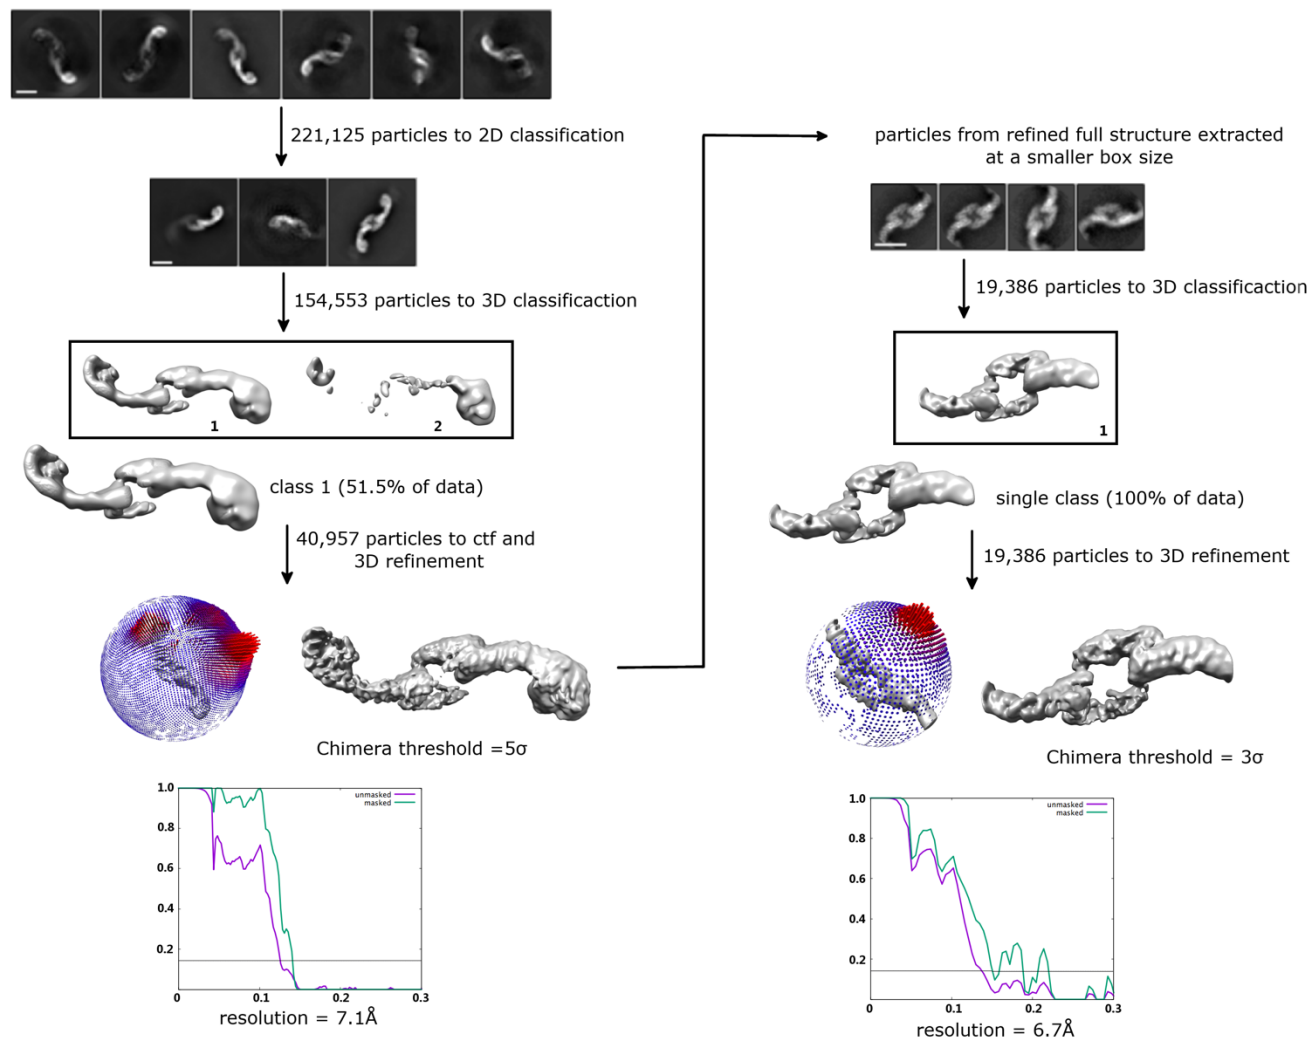

**Figure S4. CryoEM image and data processing work flow for retromer 3KE mutant.** Particles were autopicked from a single dataset using a 3D starting model (details in Methods). 3KE mutant particles were separated from other biochemical species during 2D classification, and 3D reconstructions were generated for both the intact dimer (left branch) and the sub-structure focusing on the chain link (right branch). Fourier Shell Correlation (FSC) plots showing masked and unmasked resolution estimates from RELION are shown for each structure or sub-structure; the grey line marks the 0.143 cut-off.



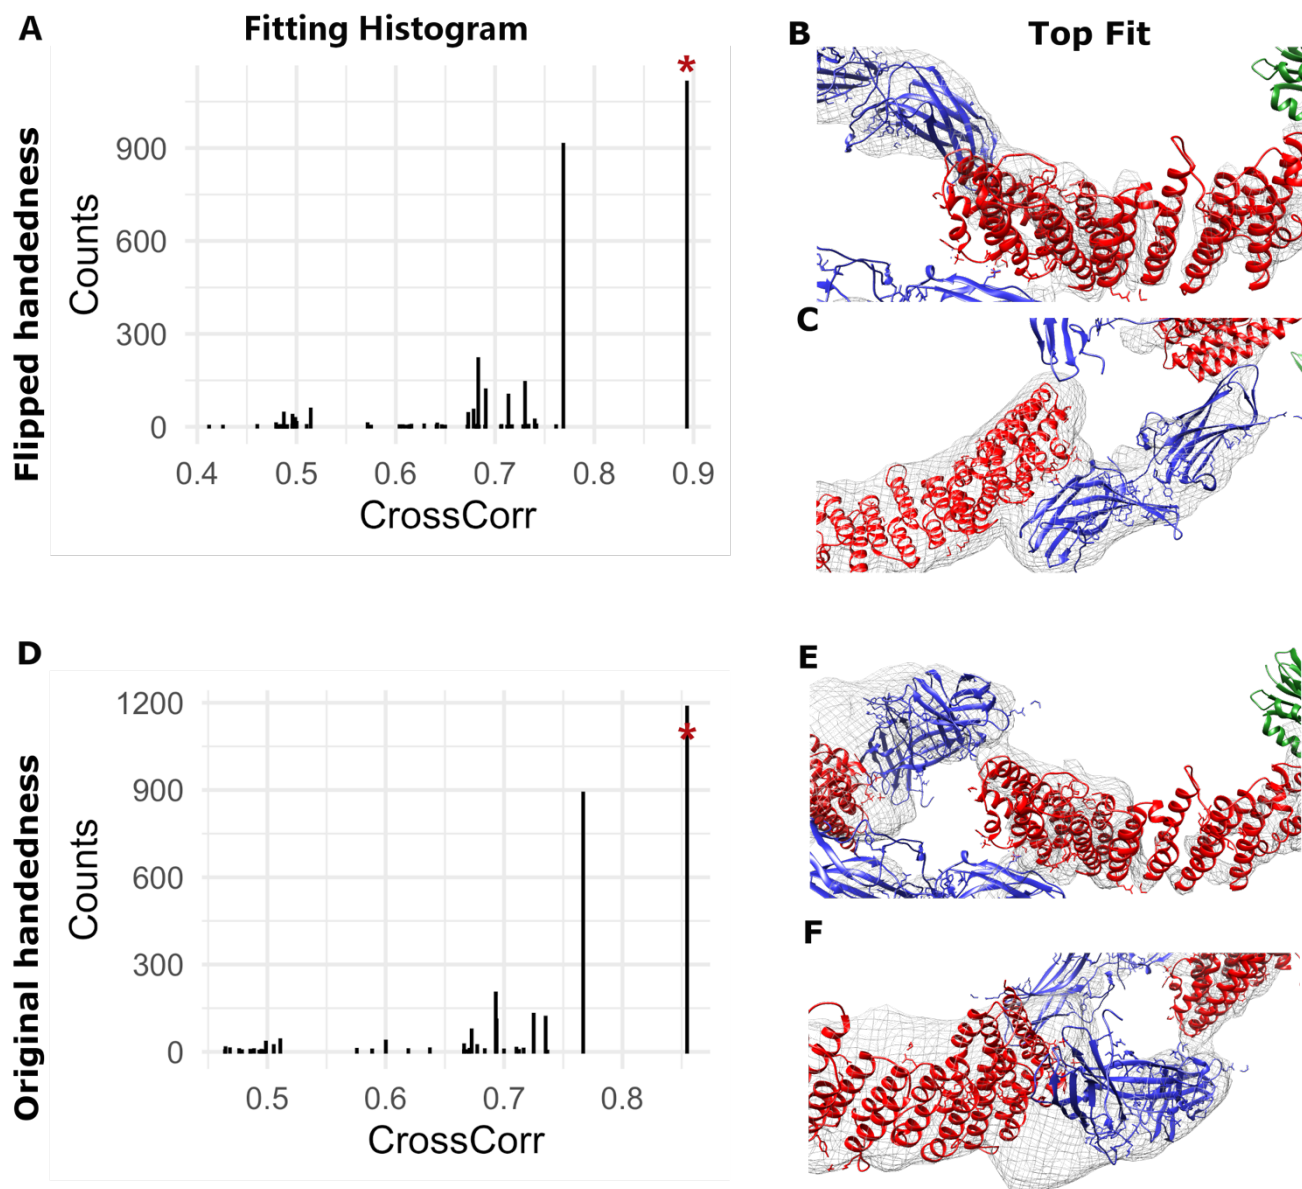

**Figure S5. Analysis of retromer 3KE mutant map handedness.** Map handedness was systematically analyzed by performing random rigid-body fits of real-space refined retromer models into each map (details in Methods); cross correlation coefficients and number of hits for each fit are shown. (A) Fitting histogram for flipped map handedness map showing counts of random rigid-body fits and cross-correlation values (Chimera). Magenta star marks top fit. (B, C) View of top fitted model in Coulomb potential map. Maps were generated using CCP4MG and are shown at  $6\sigma$  contour level; VPS35 in red ribbons; VPS26 in blue ribbons; VPS29 in green ribbons. (D) Fitting histogram for original map handedness showing counts of random rigid-body fits and cross-correlation values (Chimera). (E, F) View of top fitted model in Coulomb potential map. Maps were generated using CCP4MG and are shown at  $6\sigma$  contour level. This analysis suggests the flipped handedness (C, D) represents the correct handedness.

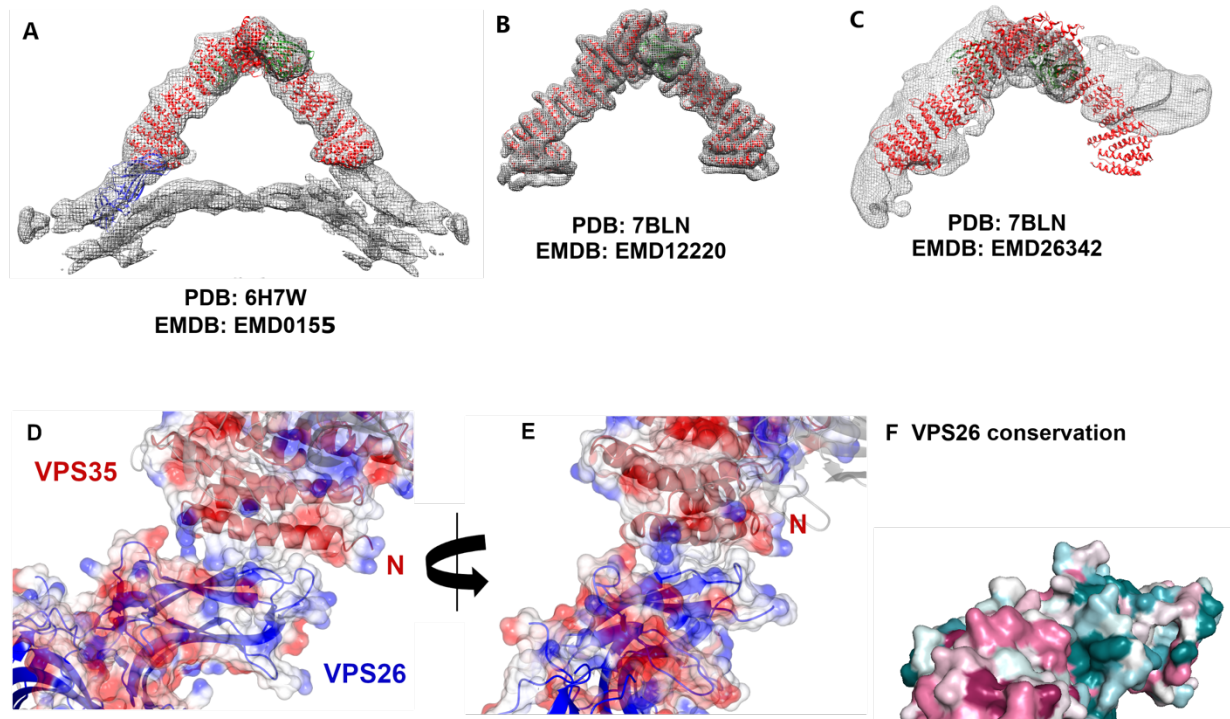

**Figure S6. Analysis of retromer interfaces.** (A, B) Equivalent views of published retromer arches are shown with their respective Coulomb potential maps from EMDB. (C) While individual retromer heterotrimers can be fitted as rigid bodies into the dimer map (cf. Figure 2; Figure S2), assembled arches are very poorly fitted as a single rigid body into the dimer map (rigid body fits in Chimera; full details in Discussion). (D, E) Two views rotated by 45 degrees of the N-VPS26A/N-VPS35 interface observed between a N-VPS35 (red ribbons) and N-VPS26A (blue ribbons) in a neighboring molecule; transparent electrostatic surface views are overlaid to demonstrate surfaces. The first helix of VPS35 (residues 12-36; labelled “N”) interacts primarily with two  $\beta$ -strands (residues 48-56; 105-111) and two loops (residues 56-63; 101-105) in N-VPS26A. The overall shape of each subunit is complementary to its binding partner. (F) VPS26 conservation (ConSurf) mapped onto the VPS26A structure. The N-terminal interface with VPS35 does not exhibit high conservation levels across eukaryotes, suggesting this interface may not occur in all organisms with retromer.
